# Supplementary material
Source: Research Square preprint supplement (doi:10.21203/rs.3.rs-10045881/v1)
Supplement: Supplementary file 1 [file 6444be54db40b4b2993a8455.pdf]

Table s1(Dataset) Introduction to the Dataset in NicheDECODE Work. Settings of Important Hyperparameters When Using the NicheDECODE Model

| <b>Dataset</b>                                                            | <b>Species</b> | <b>Tissue</b>  | <b>PMID</b> | <b>Train tissue num</b> | <b>Test tissue num</b> | <b>Epoch</b> | <b>Embedding_dim</b> | <b>Learning rate</b> |
|---------------------------------------------------------------------------|----------------|----------------|-------------|-------------------------|------------------------|--------------|----------------------|----------------------|
| NanoString CosMx lung cancer dataset                                      | Homo sapiens   | lung           | 36203011    | 14,984                  | 1,215                  | 36           | 256                  | 0.0001               |
| Xenium human breast cancer dataset                                        | Homo sapiens   | breast         | 38114474    | 10,000                  | 1,240                  | 115          | 256                  | 0.0001               |
| Sequential fluorescence in situ hybridization mouse organogenesis dataset | Mouse          | embryo         | 34489600    | 11,120                  | 1,397                  | 39           | 256                  | 0.0001               |
| Mouse hippocampus datasets(normal)                                        | Mouse          | hippocampus    | 33288904    | 9,932                   | \                      | 31           | 256                  | 0.0001               |
| Mouse hippocampus datasets(AD)                                            | Mouse          | hippocampus    | 36050488    | \                       | 1,044                  | \            | 256                  | 0.0001               |
| Mouse olfactory bulb datasets(Slide-seqV2)                                | Mouse          | olfactory bulb | 33288904    | 9,825                   | \                      | 53           | 256                  | 0.0001               |
| Mouse olfactory bulb datasets(Stereo-seq)                                 | Mouse          | olfactory bulb | 35512705    | \                       | 1,348                  | \            | 256                  | 0.0001               |
| Stereo-CITE-seq dataset                                                   | Mouse          | thymus         | 38907114    | 6,493                   | 362                    | 34           | 256                  | 0.0001               |
| CODEX mouse spleen dataset                                                | Mouse          | spleen         | 30078711    | 10,585                  | 1,487                  | 36           | 256                  | 0.0001               |

1  
2  
3  
4  
5  
6  
7  
8  
9  
10  
11  
12  
13  
14

Table s2(NSCLC) Overall and niche-specific evaluation metrics in the NSCLC dataset.

| Method     | Index | RMSE        | CCC         | R           |  |  |  |  | RMSE              | CCC         | R           |             |
|------------|-------|-------------|-------------|-------------|--|--|--|--|-------------------|-------------|-------------|-------------|
| Ours       | 0     | 0.127488083 | 0.590349245 | 0.802767682 |  |  |  |  | <b>Ours</b>       | 0.075863088 | 0.862998229 | 0.871598587 |
| Ours       | 1     | 0.073183194 | 0.84438628  | 0.862199995 |  |  |  |  | <b>SCP</b>        | 0.103669303 | 0.733075407 | 0.746609041 |
| Ours       | 2     | 0.052243853 | 0.912277689 | 0.93003093  |  |  |  |  | <b>RCTD</b>       | 0.119020296 | 0.754017143 | 0.764931631 |
| Ours       | 3     | 0.055532377 | 0.682648625 | 0.741409473 |  |  |  |  | <b>tangram</b>    | 0.103216659 | 0.784553738 | 0.7849416   |
| Ours       | 4     | 0.070432982 | 0.94100833  | 0.962879945 |  |  |  |  | <b>CIBERSORTx</b> | 0.106976237 | 0.753590961 | 0.75395967  |
| Ours       | 5     | 0.046348547 | 0.929701236 | 0.943329767 |  |  |  |  | <b>ucdselect</b>  | 0.163226084 | 0.609226283 | 0.638122414 |
| SCP        | 0     | 0.167484492 | 0.230596171 | 0.660336175 |  |  |  |  |                   |             |             |             |
| SCP        | 1     | 0.128662177 | 0.674029685 | 0.839172201 |  |  |  |  |                   |             |             |             |
| SCP        | 2     | 0.06608903  | 0.876084959 | 0.886010919 |  |  |  |  |                   |             |             |             |
| SCP        | 3     | 0.070087263 | 0.605755975 | 0.721612214 |  |  |  |  |                   |             |             |             |
| SCP        | 4     | 0.089820113 | 0.901436318 | 0.924777946 |  |  |  |  |                   |             |             |             |
| SCP        | 5     | 0.050312011 | 0.910123236 | 0.93590834  |  |  |  |  |                   |             |             |             |
| RCTD       | 0     | 0.180197788 | 0.521547903 | 0.665482061 |  |  |  |  |                   |             |             |             |
| RCTD       | 1     | 0.074597344 | 0.813731851 | 0.823945195 |  |  |  |  |                   |             |             |             |
| RCTD       | 2     | 0.072319912 | 0.826463719 | 0.875718761 |  |  |  |  |                   |             |             |             |
| RCTD       | 3     | 0.152422874 | 0.473676803 | 0.692972361 |  |  |  |  |                   |             |             |             |
| RCTD       | 4     | 0.095532255 | 0.913850586 | 0.948676967 |  |  |  |  |                   |             |             |             |
| RCTD       | 5     | 0.096797023 | 0.811157133 | 0.878611851 |  |  |  |  |                   |             |             |             |
| tangram    | 0     | 0.127506231 | 0.676026573 | 0.717209061 |  |  |  |  |                   |             |             |             |
| tangram    | 1     | 0.110102204 | 0.754211673 | 0.812504063 |  |  |  |  |                   |             |             |             |
| tangram    | 2     | 0.065924491 | 0.862633894 | 0.871352908 |  |  |  |  |                   |             |             |             |
| tangram    | 3     | 0.134126244 | 0.519156214 | 0.701380909 |  |  |  |  |                   |             |             |             |
| tangram    | 4     | 0.080969116 | 0.917043064 | 0.952595864 |  |  |  |  |                   |             |             |             |
| tangram    | 5     | 0.081546627 | 0.819307228 | 0.821750991 |  |  |  |  |                   |             |             |             |
| CIBERSORTx | 0     | 0.13048154  | 0.653370033 | 0.699239954 |  |  |  |  |                   |             |             |             |
| CIBERSORTx | 1     | 0.082054793 | 0.739496779 | 0.850575382 |  |  |  |  |                   |             |             |             |
| CIBERSORTx | 2     | 0.062775245 | 0.897535479 | 0.908681859 |  |  |  |  |                   |             |             |             |
| CIBERSORTx | 3     | 0.167564885 | 0.390326893 | 0.754693085 |  |  |  |  |                   |             |             |             |
| CIBERSORTx | 4     | 0.095767256 | 0.873098202 | 0.94368702  |  |  |  |  |                   |             |             |             |
| CIBERSORTx | 5     | 0.060950639 | 0.902672824 | 0.910408289 |  |  |  |  |                   |             |             |             |
| ucdselect  | 0     | 0.202350597 | 0.547339152 | 0.653389383 |  |  |  |  |                   |             |             |             |
| ucdselect  | 1     | 0.111853361 | 0.744462753 | 0.801455059 |  |  |  |  |                   |             |             |             |
| ucdselect  | 2     | 0.098418294 | 0.778875408 | 0.806403502 |  |  |  |  |                   |             |             |             |
| ucdselect  | 3     | 0.253888954 | 0.271640237 | 0.623569936 |  |  |  |  |                   |             |             |             |
| ucdselect  | 4     | 0.112645014 | 0.867285272 | 0.883632108 |  |  |  |  |                   |             |             |             |
| ucdselect  | 5     | 0.139874688 | 0.546530254 | 0.618829685 |  |  |  |  |                   |             |             |             |

Table s3(Breast) Overall and niche-specific evaluation metrics in the Breast dataset.

| Method     | Index | RMSE        | CCC         | R           |  |  |  |                   | RMSE        | CCC         | R           |
|------------|-------|-------------|-------------|-------------|--|--|--|-------------------|-------------|-------------|-------------|
| Ours       | 0     | 0.06800741  | 0.899804513 | 0.923173419 |  |  |  | <b>Ours</b>       | 0.056143566 | 0.963206317 | 0.963367792 |
| Ours       | 1     | 0.042952676 | 0.984377299 | 0.985088927 |  |  |  | <b>SCP</b>        | 0.158647377 | 0.574530869 | 0.652772823 |
| Ours       | 2     | 0.070357692 | 0.939536891 | 0.942225081 |  |  |  | <b>RCTD</b>       | 0.091874058 | 0.892111752 | 0.898075267 |
| Ours       | 3     | 0.057423384 | 0.818351569 | 0.820336982 |  |  |  | <b>tangram</b>    | 0.141132987 | 0.7481304   | 0.752140521 |
| Ours       | 4     | 0.037224201 | 0.953432229 | 0.956117556 |  |  |  | <b>CIBERSORTx</b> | 0.095529562 | 0.88307498  | 0.889259502 |
| Ours       | 5     | 0.053923441 | 0.786605328 | 0.788419962 |  |  |  | <b>ucdselect</b>  | 0.148227614 | 0.726867492 | 0.729475194 |
| Ours       | 6     | 0.055260574 | 0.985306378 | 0.988391648 |  |  |  |                   |             |             |             |
| SCP        | 0     | 0.169584512 | 0.044160505 | 0.075895699 |  |  |  |                   |             |             |             |
| SCP        | 1     | 0.097389672 | 0.900206198 | 0.925590984 |  |  |  |                   |             |             |             |
| SCP        | 2     | 0.109295706 | 0.847001661 | 0.881393263 |  |  |  |                   |             |             |             |
| SCP        | 3     | 0.077417919 | 0.560623008 | 0.603067483 |  |  |  |                   |             |             |             |
| SCP        | 4     | 0.132050966 | 0.422888426 | 0.514528828 |  |  |  |                   |             |             |             |
| SCP        | 5     | 0.087917544 | 0.533805581 | 0.65365736  |  |  |  |                   |             |             |             |
| SCP        | 6     | 0.307950058 | 0.225380701 | 0.817228459 |  |  |  |                   |             |             |             |
| RCTD       | 0     | 0.101077954 | 0.725846973 | 0.87427687  |  |  |  |                   |             |             |             |
| RCTD       | 1     | 0.084500831 | 0.927671888 | 0.962830426 |  |  |  |                   |             |             |             |
| RCTD       | 2     | 0.076810108 | 0.926319958 | 0.931230985 |  |  |  |                   |             |             |             |
| RCTD       | 3     | 0.110261182 | 0.619027907 | 0.760567154 |  |  |  |                   |             |             |             |
| RCTD       | 4     | 0.090774295 | 0.737090682 | 0.796332175 |  |  |  |                   |             |             |             |
| RCTD       | 5     | 0.068775969 | 0.688625959 | 0.714391795 |  |  |  |                   |             |             |             |
| RCTD       | 6     | 0.10344722  | 0.941363912 | 0.968803225 |  |  |  |                   |             |             |             |
| tangram    | 0     | 0.126724855 | 0.734902274 | 0.765544577 |  |  |  |                   |             |             |             |
| tangram    | 1     | 0.118387391 | 0.848508347 | 0.899184922 |  |  |  |                   |             |             |             |
| tangram    | 2     | 0.165813648 | 0.62428138  | 0.823193245 |  |  |  |                   |             |             |             |
| tangram    | 3     | 0.15664434  | 0.508231548 | 0.692837485 |  |  |  |                   |             |             |             |
| tangram    | 4     | 0.112959802 | 0.702519185 | 0.76657665  |  |  |  |                   |             |             |             |
| tangram    | 5     | 0.161550296 | 0.437947321 | 0.664271112 |  |  |  |                   |             |             |             |
| tangram    | 6     | 0.135885422 | 0.895496496 | 0.944067841 |  |  |  |                   |             |             |             |
| CIBERSORTx | 0     | 0.091047835 | 0.817427032 | 0.830358799 |  |  |  |                   |             |             |             |
| CIBERSORTx | 1     | 0.07440148  | 0.948027515 | 0.955529358 |  |  |  |                   |             |             |             |
| CIBERSORTx | 2     | 0.127905994 | 0.781959131 | 0.911007912 |  |  |  |                   |             |             |             |
| CIBERSORTx | 3     | 0.084844112 | 0.728715344 | 0.788357045 |  |  |  |                   |             |             |             |
| CIBERSORTx | 4     | 0.070168606 | 0.852866964 | 0.865316288 |  |  |  |                   |             |             |             |
| CIBERSORTx | 5     | 0.071932542 | 0.670614871 | 0.683539964 |  |  |  |                   |             |             |             |
| CIBERSORTx | 6     | 0.128060926 | 0.913176883 | 0.95456864  |  |  |  |                   |             |             |             |
| ucdselect  | 0     | 0.142719602 | 0.61630442  | 0.635009976 |  |  |  |                   |             |             |             |
| ucdselect  | 1     | 0.158223758 | 0.75405252  | 0.844974187 |  |  |  |                   |             |             |             |
| ucdselect  | 2     | 0.126054044 | 0.812499344 | 0.875304646 |  |  |  |                   |             |             |             |
| ucdselect  | 3     | 0.201997977 | 0.291396502 | 0.462993779 |  |  |  |                   |             |             |             |
| ucdselect  | 4     | 0.129417634 | 0.697108986 | 0.842006559 |  |  |  |                   |             |             |             |
| ucdselect  | 5     | 0.117936946 | 0.396486163 | 0.441265766 |  |  |  |                   |             |             |             |
| ucdselect  | 6     | 0.145070621 | 0.878969114 | 0.946555241 |  |  |  |                   |             |             |             |

Table s4(embryo) Overall and niche-specific evaluation metrics in the Embryo dataset.

| Method     | Index | RMSE        | CCC         | R           |  |  |  |                   | RMSE        | CCC         | R           |
|------------|-------|-------------|-------------|-------------|--|--|--|-------------------|-------------|-------------|-------------|
| Ours       | 0     | 0.101060321 | 0.843121462 | 0.882881266 |  |  |  | <b>Ours</b>       | 0.089170901 | 0.84355282  | 0.86108055  |
| Ours       | 1     | 0.064745822 | 0.772538513 | 0.797311177 |  |  |  | <b>SCP</b>        | 0.107922764 | 0.727971962 | 0.80435453  |
| Ours       | 2     | 0.078831357 | 0.866103346 | 0.906434377 |  |  |  | <b>RCTD</b>       | 0.094472225 | 0.827665113 | 0.841158874 |
| Ours       | 3     | 0.092452311 | 0.733691451 | 0.809488522 |  |  |  | <b>tangram</b>    | 0.12031355  | 0.674774347 | 0.726677311 |
| Ours       | 4     | 0.083015607 | 0.790588078 | 0.847280388 |  |  |  | <b>CIBERSORTx</b> | 0.108935536 | 0.790897251 | 0.793151828 |
| Ours       | 5     | 0.029699587 | 0.815489314 | 0.923216546 |  |  |  | <b>ucdselect</b>  | 0.126586166 | 0.727256389 | 0.727802928 |
| Ours       | 6     | 0.136819107 | 0.792847534 | 0.85408197  |  |  |  |                   |             |             |             |
| SCP        | 0     | 0.147325572 | 0.676951561 | 0.848362745 |  |  |  |                   |             |             |             |
| SCP        | 1     | 0.09455651  | 0.635075568 | 0.789008588 |  |  |  |                   |             |             |             |
| SCP        | 2     | 0.087828781 | 0.828877056 | 0.894276323 |  |  |  |                   |             |             |             |
| SCP        | 3     | 0.093318561 | 0.718275039 | 0.805388708 |  |  |  |                   |             |             |             |
| SCP        | 4     | 0.082587607 | 0.780134059 | 0.849226728 |  |  |  |                   |             |             |             |
| SCP        | 5     | 0.093833401 | 0.336554222 | 0.748904914 |  |  |  |                   |             |             |             |
| SCP        | 6     | 0.137250992 | 0.732842427 | 0.840340081 |  |  |  |                   |             |             |             |
| RCTD       | 0     | 0.122013309 | 0.794289163 | 0.798217429 |  |  |  |                   |             |             |             |
| RCTD       | 1     | 0.056577739 | 0.82810585  | 0.841291293 |  |  |  |                   |             |             |             |
| RCTD       | 2     | 0.091666874 | 0.803642126 | 0.832077382 |  |  |  |                   |             |             |             |
| RCTD       | 3     | 0.089979285 | 0.748360668 | 0.821479282 |  |  |  |                   |             |             |             |
| RCTD       | 4     | 0.095116016 | 0.776454338 | 0.778250084 |  |  |  |                   |             |             |             |
| RCTD       | 5     | 0.037521177 | 0.678704152 | 0.902068956 |  |  |  |                   |             |             |             |
| RCTD       | 6     | 0.132033096 | 0.766066573 | 0.846974378 |  |  |  |                   |             |             |             |
| tangram    | 0     | 0.158350827 | 0.632811628 | 0.788212504 |  |  |  |                   |             |             |             |
| tangram    | 1     | 0.097367497 | 0.715853667 | 0.825174116 |  |  |  |                   |             |             |             |
| tangram    | 2     | 0.105067326 | 0.713533879 | 0.860377105 |  |  |  |                   |             |             |             |
| tangram    | 3     | 0.08198682  | 0.800565423 | 0.850986191 |  |  |  |                   |             |             |             |
| tangram    | 4     | 0.108463466 | 0.664714507 | 0.703725594 |  |  |  |                   |             |             |             |
| tangram    | 5     | 0.126443161 | 0.365409482 | 0.904631376 |  |  |  |                   |             |             |             |
| tangram    | 6     | 0.145804186 | 0.706846064 | 0.884773802 |  |  |  |                   |             |             |             |
| CIBERSORTx | 0     | 0.124088024 | 0.805717731 | 0.811295864 |  |  |  |                   |             |             |             |
| CIBERSORTx | 1     | 0.079357389 | 0.757841962 | 0.789375338 |  |  |  |                   |             |             |             |
| CIBERSORTx | 2     | 0.120606342 | 0.665526876 | 0.769610863 |  |  |  |                   |             |             |             |
| CIBERSORTx | 3     | 0.095102248 | 0.750483427 | 0.773086045 |  |  |  |                   |             |             |             |
| CIBERSORTx | 4     | 0.081976096 | 0.818417257 | 0.838623886 |  |  |  |                   |             |             |             |
| CIBERSORTx | 5     | 0.034740649 | 0.752975401 | 0.931928343 |  |  |  |                   |             |             |             |
| CIBERSORTx | 6     | 0.17278861  | 0.695180601 | 0.748153836 |  |  |  |                   |             |             |             |
| ucdselect  | 0     | 0.174389798 | 0.61215547  | 0.623961498 |  |  |  |                   |             |             |             |
| ucdselect  | 1     | 0.110864628 | 0.54458743  | 0.555842392 |  |  |  |                   |             |             |             |
| ucdselect  | 2     | 0.134982272 | 0.692317677 | 0.725829953 |  |  |  |                   |             |             |             |
| ucdselect  | 3     | 0.11057499  | 0.698846745 | 0.722089878 |  |  |  |                   |             |             |             |
| ucdselect  | 4     | 0.115234265 | 0.732152168 | 0.742749414 |  |  |  |                   |             |             |             |
| ucdselect  | 5     | 0.102236175 | 0.423938757 | 0.662777244 |  |  |  |                   |             |             |             |
| ucdselect  | 6     | 0.123642314 | 0.832731738 | 0.848276465 |  |  |  |                   |             |             |             |

Table s5(Alzheimer) Overall and niche-specific evaluation metrics in the Alzheimer dataset.

| Method     | Index | RMSE        | CCC         | R           |  |  |  |  | RMSE              | CCC         | R           |             |
|------------|-------|-------------|-------------|-------------|--|--|--|--|-------------------|-------------|-------------|-------------|
| Ours       | 0     | 0.146517163 | 0.445823894 | 0.703309735 |  |  |  |  | <b>Ours</b>       | 0.107716956 | 0.657010698 | 0.709877021 |
| Ours       | 1     | 0.074798512 | 0.387705964 | 0.57617875  |  |  |  |  | <b>SCP</b>        | 0.129710744 | 0.427640012 | 0.528032828 |
| Ours       | 2     | 0.130739798 | 0.366767336 | 0.474355508 |  |  |  |  | <b>RCTD</b>       | 0.198533013 | 0.424622803 | 0.448057414 |
| Ours       | 3     | 0.105125939 | 0.690190741 | 0.734275233 |  |  |  |  | <b>tangram</b>    | 0.14590108  | 0.423039388 | 0.43861178  |
| Ours       | 4     | 0.077819317 | 0.734523824 | 0.936330459 |  |  |  |  | <b>CIBERSORTx</b> | 0.219503452 | 0.206038758 | 0.211789921 |
| Ours       | 5     | 0.091407629 | 0.371528885 | 0.602443393 |  |  |  |  | <b>ucdselect</b>  | 0.155535963 | 0.605315264 | 0.623393523 |
| SCP        | 0     | 0.186685497 | 0.330009776 | 0.63744097  |  |  |  |  |                   |             |             |             |
| SCP        | 1     | 0.103493826 | 0.164004877 | 0.191345985 |  |  |  |  |                   |             |             |             |
| SCP        | 2     | 0.12642435  | 0.315538314 | 0.374863077 |  |  |  |  |                   |             |             |             |
| SCP        | 3     | 0.117707424 | 0.608299849 | 0.672539036 |  |  |  |  |                   |             |             |             |
| SCP        | 4     | 0.102893339 | 0.61798667  | 0.794463912 |  |  |  |  |                   |             |             |             |
| SCP        | 5     | 0.122317709 | 0.223846957 | 0.363564035 |  |  |  |  |                   |             |             |             |
| RCTD       | 0     | 0.255937341 | 0.236991247 | 0.504805483 |  |  |  |  |                   |             |             |             |
| RCTD       | 1     | 0.134370108 | 0.136313828 | 0.372718733 |  |  |  |  |                   |             |             |             |
| RCTD       | 2     | 0.285908687 | 0.22303112  | 0.42478914  |  |  |  |  |                   |             |             |             |
| RCTD       | 3     | 0.149148645 | 0.64927389  | 0.674494175 |  |  |  |  |                   |             |             |             |
| RCTD       | 4     | 0.197426856 | 0.590815029 | 0.901076759 |  |  |  |  |                   |             |             |             |
| RCTD       | 5     | 0.099832043 | 0.470849329 | 0.666105227 |  |  |  |  |                   |             |             |             |
| tangram    | 0     | 0.226199188 | 0.155784028 | 0.306070632 |  |  |  |  |                   |             |             |             |
| tangram    | 1     | 0.119901701 | 0.406188397 | 0.474567299 |  |  |  |  |                   |             |             |             |
| tangram    | 2     | 0.150744271 | 0.2428739   | 0.258956135 |  |  |  |  |                   |             |             |             |
| tangram    | 3     | 0.123805222 | 0.699798442 | 0.702834924 |  |  |  |  |                   |             |             |             |
| tangram    | 4     | 0.075374574 | 0.786669237 | 0.869143172 |  |  |  |  |                   |             |             |             |
| tangram    | 5     | 0.13582108  | 0.405709707 | 0.572633686 |  |  |  |  |                   |             |             |             |
| CIBERSORTx | 0     | 0.321395946 | 0.048628587 | 0.570840312 |  |  |  |  |                   |             |             |             |
| CIBERSORTx | 1     | 0.135921965 | 0.100567274 | 0.46446555  |  |  |  |  |                   |             |             |             |
| CIBERSORTx | 2     | 0.272699386 | 0.174731387 | 0.450753143 |  |  |  |  |                   |             |             |             |
| CIBERSORTx | 3     | 0.142491709 | 0.537499455 | 0.743568796 |  |  |  |  |                   |             |             |             |
| CIBERSORTx | 4     | 0.255862034 | 0.396469279 | 0.808566909 |  |  |  |  |                   |             |             |             |
| CIBERSORTx | 5     | 0.08477167  | 0.595178506 | 0.666104298 |  |  |  |  |                   |             |             |             |
| ucdselect  | 0     | 0.17621239  | 0.533393792 | 0.584441504 |  |  |  |  |                   |             |             |             |
| ucdselect  | 1     | 0.129602161 | 0.437444244 | 0.501438583 |  |  |  |  |                   |             |             |             |
| ucdselect  | 2     | 0.21061505  | 0.279992463 | 0.310995955 |  |  |  |  |                   |             |             |             |
| ucdselect  | 3     | 0.159477218 | 0.638615166 | 0.681428199 |  |  |  |  |                   |             |             |             |
| ucdselect  | 4     | 0.131596322 | 0.761034895 | 0.938192472 |  |  |  |  |                   |             |             |             |
| ucdselect  | 5     | 0.100954517 | 0.696644349 | 0.731535038 |  |  |  |  |                   |             |             |             |

Table s6(Mob) Overall and niche-specific evaluation metrics in the Mob dataset.

| Method     | Index | RMSE        | CCC          | R            |  |  |  |  | RMSE              | CCC         | R           |             |
|------------|-------|-------------|--------------|--------------|--|--|--|--|-------------------|-------------|-------------|-------------|
| Ours       | 0     | 0.13381578  | 0.491353278  | 0.715864626  |  |  |  |  | <b>Ours</b>       | 0.115762688 | 0.839996911 | 0.840256463 |
| Ours       | 1     | 0.129022673 | 0.866653174  | 0.959060229  |  |  |  |  | <b>SCP</b>        | 0.190772249 | 0.746111241 | 0.814539364 |
| Ours       | 2     | 0.088638212 | 0.746721377  | 0.767119979  |  |  |  |  | <b>RCTD</b>       | 0.282857295 | 0.510066436 | 0.579409636 |
| Ours       | 3     | 0.105800538 | 0.633424116  | 0.899064938  |  |  |  |  | <b>tangram</b>    | 0.188093187 | 0.467707661 | 0.488932885 |
| SCP        | 0     | 0.198014445 | 0.544181258  | 0.640938577  |  |  |  |  | <b>CIBERSORTx</b> | 0.301558601 | 0.457353254 | 0.52391174  |
| SCP        | 1     | 0.284190663 | 0.67689011   | 0.928716335  |  |  |  |  |                   |             |             |             |
| SCP        | 2     | 0.123749715 | 0.544450552  | 0.674759985  |  |  |  |  |                   |             |             |             |
| SCP        | 3     | 0.101430563 | 0.692035292  | 0.848454482  |  |  |  |  |                   |             |             |             |
| RCTD       | 0     | 0.271529348 | 0.158706715  | 0.472783832  |  |  |  |  |                   |             |             |             |
| RCTD       | 1     | 0.450465618 | 0.262737489  | 0.871194921  |  |  |  |  |                   |             |             |             |
| RCTD       | 2     | 0.137528744 | 0.445179317  | 0.521505142  |  |  |  |  |                   |             |             |             |
| RCTD       | 3     | 0.156433313 | 0.369339811  | 0.803218881  |  |  |  |  |                   |             |             |             |
| tangram    | 0     | 0.227661877 | -0.061607815 | -0.065986476 |  |  |  |  |                   |             |             |             |
| tangram    | 1     | 0.210222596 | 0.603525864  | 0.952009608  |  |  |  |  |                   |             |             |             |
| tangram    | 2     | 0.164708075 | 0.538870324  | 0.717291272  |  |  |  |  |                   |             |             |             |
| tangram    | 3     | 0.135513717 | 0.648186789  | 0.806665254  |  |  |  |  |                   |             |             |             |
| CIBERSORTx | 0     | 0.311122809 | 0.08974112   | 0.486335242  |  |  |  |  |                   |             |             |             |
| CIBERSORTx | 1     | 0.476884149 | 0.203114219  | 0.843753981  |  |  |  |  |                   |             |             |             |
| CIBERSORTx | 2     | 0.106847863 | 0.533299054  | 0.581957194  |  |  |  |  |                   |             |             |             |
| CIBERSORTx | 3     | 0.167684222 | 0.2930722    | 0.781665739  |  |  |  |  |                   |             |             |             |

Table s7(CODEX) Overall and niche-specific evaluation metrics in the CODEX dataset.

| Method  | Index | RMSE        | CCC         | R           |  |  |  |  | RMSE           | CCC         | R           |             |
|---------|-------|-------------|-------------|-------------|--|--|--|--|----------------|-------------|-------------|-------------|
| Ours    | 0     | 0.061230002 | 0.445661491 | 0.520304123 |  |  |  |  | <b>Ours</b>    | 0.062607357 | 0.78081572  | 0.791498416 |
| Ours    | 1     | 0.065523442 | 0.794202783 | 0.808427647 |  |  |  |  | <b>SCP</b>     | 0.072910332 | 0.614597213 | 0.713918685 |
| Ours    | 2     | 0.078897516 | 0.548037241 | 0.636568067 |  |  |  |  | <b>tangram</b> | 0.111458686 | 0.506484002 | 0.514261197 |
| Ours    | 3     | 0.055248937 | 0.347490731 | 0.384395581 |  |  |  |  |                |             |             |             |
| Ours    | 4     | 0.062704044 | 0.790337584 | 0.798074392 |  |  |  |  |                |             |             |             |
| Ours    | 5     | 0.052758061 | 0.235872453 | 0.367336844 |  |  |  |  |                |             |             |             |
| Ours    | 6     | 0.072785932 | 0.771924923 | 0.806543616 |  |  |  |  |                |             |             |             |
| Ours    | 7     | 0.04499722  | 0.935200078 | 0.945201241 |  |  |  |  |                |             |             |             |
| SCP     | 0     | 0.062099033 | 0.325268837 | 0.52663151  |  |  |  |  |                |             |             |             |
| SCP     | 1     | 0.061702131 | 0.818281477 | 0.8456514   |  |  |  |  |                |             |             |             |
| SCP     | 2     | 0.079833316 | 0.456325061 | 0.643871238 |  |  |  |  |                |             |             |             |
| SCP     | 3     | 0.064606357 | 0.188425601 | 0.380303411 |  |  |  |  |                |             |             |             |
| SCP     | 4     | 0.105976058 | 0.184592863 | 0.678395119 |  |  |  |  |                |             |             |             |
| SCP     | 5     | 0.057027307 | 0.193668462 | 0.321295918 |  |  |  |  |                |             |             |             |
| SCP     | 6     | 0.074510921 | 0.711061907 | 0.809549414 |  |  |  |  |                |             |             |             |
| SCP     | 7     | 0.065434193 | 0.829315558 | 0.914384931 |  |  |  |  |                |             |             |             |
| tangram | 0     | 0.124866248 | 0.251314496 | 0.358464486 |  |  |  |  |                |             |             |             |
| tangram | 1     | 0.110816042 | 0.636243655 | 0.66254273  |  |  |  |  |                |             |             |             |
| tangram | 2     | 0.10570791  | 0.544815559 | 0.568409914 |  |  |  |  |                |             |             |             |
| tangram | 3     | 0.120519061 | 0.156973042 | 0.214314779 |  |  |  |  |                |             |             |             |
| tangram | 4     | 0.131466972 | 0.304416745 | 0.357981042 |  |  |  |  |                |             |             |             |
| tangram | 5     | 0.121387557 | 0.111737156 | 0.144570354 |  |  |  |  |                |             |             |             |
| tangram | 6     | 0.089985199 | 0.726892767 | 0.728046498 |  |  |  |  |                |             |             |             |
| tangram | 7     | 0.075483035 | 0.814143015 | 0.831990843 |  |  |  |  |                |             |             |             |

33

Table s8(Thymus) Overall and niche-specific evaluation metrics in the Thymus dataset.

| Method  | Index | RMSE        | CCC         | R           |  |  |  |  | RMSE           | CCC         | R           |             |
|---------|-------|-------------|-------------|-------------|--|--|--|--|----------------|-------------|-------------|-------------|
| Ours    | 0     | 0.093168624 | 0.831166458 | 0.887791828 |  |  |  |  | <b>Ours</b>    | 0.1314229   | 0.671825569 | 0.700511887 |
| Ours    | 1     | 0.137912185 | 0.54445349  | 0.584612193 |  |  |  |  | <b>SCP</b>     | 0.138810219 | 0.581090532 | 0.657672151 |
| Ours    | 2     | 0.155292539 | 0.618536801 | 0.632086073 |  |  |  |  | <b>tangram</b> | 0.197149907 | 0.393278223 | 0.393858099 |
| SCP     | 0     | 0.090266139 | 0.846740553 | 0.906380318 |  |  |  |  |                |             |             |             |
| SCP     | 1     | 0.153718371 | 0.288515724 | 0.43215676  |  |  |  |  |                |             |             |             |
| SCP     | 2     | 0.16133046  | 0.46678017  | 0.649290687 |  |  |  |  |                |             |             |             |
| tangram | 0     | 0.141616694 | 0.60984541  | 0.65609934  |  |  |  |  |                |             |             |             |
| tangram | 1     | 0.210156312 | 0.310074584 | 0.313598392 |  |  |  |  |                |             |             |             |
| tangram | 2     | 0.228873969 | 0.312480153 | 0.31272558  |  |  |  |  |                |             |             |             |

34

35

Table S9(ROSMAP)

| index    | braaksc | Layer_3     | Layer_1     | WM         | Layer_5     | Layer_6     | Layer_2     | Layer_4     |
|----------|---------|-------------|-------------|------------|-------------|-------------|-------------|-------------|
| R1015854 | 2       | 0.072087534 | 0.08761566  | 0.53830624 | 0.071374394 | 0.0898788   | 0.04992111  | 0.09081623  |
| R1018391 | 4       | 0.059545927 | 0.076097526 | 0.60900897 | 0.059355482 | 0.07820082  | 0.039098643 | 0.07869265  |
| R1020037 | 3       | 0.10108944  | 0.110852055 | 0.37923643 | 0.09969018  | 0.11419969  | 0.07907599  | 0.11585625  |
| R1022980 | 3       | 0.030879688 | 0.044368878 | 0.7837143  | 0.031092793 | 0.046230014 | 0.017476726 | 0.046237633 |
| R1028639 | 4       | 0.072741434 | 0.08789352  | 0.53493387 | 0.0720814   | 0.09055286  | 0.050444566 | 0.09135235  |
| R1034846 | 3       | 0.065573275 | 0.07646693  | 0.5892524  | 0.06368963  | 0.07977669  | 0.044030964 | 0.08121009  |
| R1039781 | 5       | 0.07058419  | 0.084979445 | 0.5502119  | 0.069631085 | 0.08761592  | 0.04849017  | 0.08848726  |
| R1042011 | 2       | 0.08969732  | 0.10566361  | 0.4316621  | 0.08937936  | 0.107733496 | 0.066974126 | 0.10889006  |
| R1042566 | 3       | 0.086462945 | 0.099928096 | 0.45843706 | 0.08526545  | 0.10249366  | 0.06351254  | 0.1039002   |
| R1067972 | 3       | 0.07362476  | 0.08936963  | 0.5283976  | 0.07300911  | 0.09166618  | 0.051340014 | 0.09259267  |
| R1073074 | 1       | 0.07357024  | 0.08839188  | 0.5314551  | 0.0726833   | 0.09087158  | 0.05119322  | 0.09183475  |
| R1074668 | 3       | 0.080944076 | 0.096021295 | 0.48616883 | 0.0803319   | 0.09867073  | 0.058173362 | 0.09968978  |
| R1088362 | 5       | 0.10736044  | 0.122310445 | 0.32881796 | 0.10740097  | 0.12297229  | 0.0862871   | 0.124850824 |
| R1103580 | 3       | 0.117401645 | 0.123697    | 0.28830707 | 0.11616921  | 0.12690337  | 0.09892186  | 0.12859987  |
| R1105988 | 4       | 0.07130351  | 0.08735601  | 0.54076904 | 0.07093828  | 0.089934655 | 0.049149778 | 0.090548806 |
| R1133844 | 4       | 0.0641331   | 0.07960431  | 0.5852272  | 0.06354921  | 0.08193974  | 0.042893756 | 0.082652666 |
| R1133959 | 4       | 0.08963359  | 0.105660625 | 0.43138772 | 0.089500435 | 0.10797102  | 0.06685701  | 0.108989544 |
| R1141019 | 3       | 0.038542606 | 0.0521117   | 0.73898256 | 0.038429424 | 0.054527834 | 0.022766905 | 0.054638904 |
| R1154454 | 6       | 0.051142212 | 0.065404885 | 0.66401535 | 0.050691262 | 0.06809094  | 0.03218471  | 0.06847073  |
| R1158585 | 4       | 0.10805188  | 0.11833345  | 0.3356168  | 0.10707287  | 0.120990075 | 0.08728423  | 0.12265069  |
| R1173111 | 4       | 0.083298184 | 0.09749791  | 0.4748351  | 0.08238557  | 0.10022041  | 0.06039632  | 0.10136642  |
| R1177802 | 5       | 0.10233865  | 0.1165374   | 0.36056057 | 0.10197023  | 0.118241206 | 0.08058847  | 0.11976352  |
| R1188174 | 2       | 0.050591264 | 0.06456477  | 0.6679031  | 0.05010697  | 0.0673735   | 0.03173924  | 0.06772111  |
| R1213305 | 2       | 0.11018046  | 0.123003416 | 0.31538847 | 0.11032917  | 0.12491865  | 0.08972412  | 0.12645577  |
| R1214999 | 2       | 0.109955035 | 0.119386844 | 0.32535866 | 0.10914612  | 0.12256973  | 0.0895566   | 0.124026984 |
| R1218460 | 3       | 0.09994169  | 0.11605222  | 0.3693179  | 0.10024366  | 0.117629334 | 0.07786536  | 0.1189499   |
| R1229732 | 5       | 0.114226066 | 0.12399667  | 0.299529   | 0.11345056  | 0.12604344  | 0.09485962  | 0.12789464  |
| R1234575 | 2       | 0.040704187 | 0.053390596 | 0.72949433 | 0.04012019  | 0.055678677 | 0.02439152  | 0.056220546 |
| R1236313 | 3       | 0.07998532  | 0.093587965 | 0.49639454 | 0.078863434 | 0.096509196 | 0.057106875 | 0.09755269  |
| R1262106 | 4       | 0.08778523  | 0.1018545   | 0.44905284 | 0.08669449  | 0.10416613  | 0.06485873  | 0.10558814  |
| R1287407 | 5       | 0.08623851  | 0.09998759  | 0.45827392 | 0.08532148  | 0.10283932  | 0.06327996  | 0.104059234 |
| R1292460 | 5       | 0.10253159  | 0.113311626 | 0.36917803 | 0.1010277   | 0.1156978   | 0.08070445  | 0.11754884  |
| R1292795 | 2       | 0.09846486  | 0.11228186  | 0.38528737 | 0.09769694  | 0.11432236  | 0.07618816  | 0.11575846  |
| R1326552 | 1       | 0.11519677  | 0.12669727  | 0.28931102 | 0.115043566 | 0.1278469   | 0.096074864 | 0.12982963  |
| R1327471 | 4       | 0.07079348  | 0.087005995 | 0.5431795  | 0.07052259  | 0.08963716  | 0.048704825 | 0.09015648  |
| R1344510 | 3       | 0.084609985 | 0.1016872   | 0.45928645 | 0.08444598  | 0.103484906 | 0.061902903 | 0.10458261  |
| R1353719 | 3       | 0.07227494  | 0.0854173   | 0.5431897  | 0.07111076  | 0.088574074 | 0.049967863 | 0.08946535  |
| R1375133 | 3       | 0.091215216 | 0.10428322  | 0.43094456 | 0.090012096 | 0.1068921   | 0.06831541  | 0.108337335 |
| R1407047 | 2       | 0.07517257  | 0.09236221  | 0.51522064 | 0.07494743  | 0.0943466   | 0.052793723 | 0.09515684  |
| R1408186 | 5       | 0.061359208 | 0.07679164  | 0.60184956 | 0.060766738 | 0.079056226 | 0.040526304 | 0.079650305 |
| R1408411 | 2       | 0.09708512  | 0.10687662  | 0.40450576 | 0.0952293   | 0.10992927  | 0.074606396 | 0.111767516 |
| R1412995 | 5       | 0.04403084  | 0.057906136 | 0.70659393 | 0.04370099  | 0.060305785 | 0.02681495  | 0.060647435 |
| R1435458 | 2       | 0.10572554  | 0.119659096 | 0.3398326  | 0.10578964  | 0.12165826  | 0.08433717  | 0.122997716 |

|          |   |             |             |            |             |             |             |             |
|----------|---|-------------|-------------|------------|-------------|-------------|-------------|-------------|
| R1476204 | 5 | 0.06640431  | 0.08196301  | 0.5713921  | 0.065865465 | 0.08445446  | 0.044821728 | 0.08509886  |
| R1489314 | 5 | 0.036763184 | 0.049964465 | 0.75058496 | 0.036573585 | 0.05216992  | 0.021534659 | 0.052409217 |
| R1498848 | 3 | 0.121113665 | 0.13063298  | 0.2562376  | 0.121617    | 0.1322519   | 0.10423804  | 0.13390876  |
| R1521786 | 3 | 0.08945935  | 0.10245802  | 0.44049937 | 0.088539526 | 0.10572817  | 0.06646962  | 0.10684594  |
| R1528689 | 5 | 0.09069159  | 0.10546296  | 0.4292347  | 0.08996869  | 0.10771661  | 0.067956634 | 0.1089688   |
| R1531359 | 3 | 0.094055146 | 0.10816264  | 0.41010207 | 0.093475275 | 0.11081864  | 0.07143378  | 0.11195245  |
| R1547566 | 5 | 0.09760405  | 0.1081048   | 0.39958966 | 0.09588939  | 0.11085985  | 0.0752113   | 0.11274089  |
| R1566338 | 4 | 0.08830081  | 0.10410532  | 0.44171318 | 0.0875447   | 0.105721116 | 0.06554805  | 0.10706679  |
| R1571066 | 4 | 0.07804265  | 0.08864437  | 0.51668847 | 0.07589035  | 0.091849215 | 0.055384323 | 0.09350058  |
| R1573024 | 4 | 0.074470446 | 0.08863524  | 0.52822214 | 0.07333023  | 0.09120052  | 0.051956102 | 0.09218532  |
| R1583702 | 4 | 0.056018308 | 0.069572315 | 0.6378469  | 0.05516103  | 0.072464526 | 0.035950072 | 0.0729868   |
| R1588427 | 3 | 0.060985614 | 0.07654425  | 0.60312474 | 0.060571183 | 0.079015195 | 0.040228736 | 0.079530284 |
| R1609849 | 4 | 0.044877656 | 0.058167145 | 0.7033605  | 0.044331703 | 0.060679395 | 0.027443022 | 0.061140534 |
| R1617674 | 3 | 0.048927117 | 0.06352021  | 0.6761494  | 0.048601855 | 0.065963864 | 0.030509608 | 0.06632788  |
| R1620679 | 4 | 0.063159265 | 0.07718238  | 0.5945316  | 0.062321987 | 0.080197506 | 0.041878268 | 0.08072906  |
| R1627792 | 5 | 0.082089335 | 0.095264345 | 0.4850527  | 0.08085798  | 0.09815149  | 0.05923604  | 0.09934803  |
| R1631616 | 2 | 0.02894922  | 0.04113633  | 0.7983328  | 0.028986957 | 0.043178007 | 0.01616208  | 0.043254558 |
| R1640475 | 5 | 0.085103445 | 0.097089276 | 0.470535   | 0.08354685  | 0.10012287  | 0.062143724 | 0.1014589   |
| R1658200 | 4 | 0.060881145 | 0.07619375  | 0.60454047 | 0.060377702 | 0.0786887   | 0.04009424  | 0.079223946 |
| R1660726 | 1 | 0.050903186 | 0.066803314 | 0.6607836  | 0.050924156 | 0.06917911  | 0.032090683 | 0.069315955 |
| R1664857 | 5 | 0.04537404  | 0.0609472   | 0.69423735 | 0.045381177 | 0.063003995 | 0.027867544 | 0.06318872  |
| R1672797 | 4 | 0.0740521   | 0.09082869  | 0.52308154 | 0.073701635 | 0.09290933  | 0.05173654  | 0.093690164 |
| R1687970 | 3 | 0.06939712  | 0.0846539   | 0.55501884 | 0.06862389  | 0.08697985  | 0.047459718 | 0.08786666  |
| R1708627 | 3 | 0.06329956  | 0.07483792  | 0.60127324 | 0.06154952  | 0.07784862  | 0.042088427 | 0.07910272  |
| R1710143 | 4 | 0.07487085  | 0.08912924  | 0.52516276 | 0.073869206 | 0.09176239  | 0.05240712  | 0.09279844  |
| R1721075 | 5 | 0.11396135  | 0.12456595  | 0.29734445 | 0.11395397  | 0.12705892  | 0.094533555 | 0.12858175  |
| R1724172 | 4 | 0.11431669  | 0.12880689  | 0.28733698 | 0.115014054 | 0.12849958  | 0.09523976  | 0.13078605  |
| R1743384 | 2 | 0.116262175 | 0.12797871  | 0.28093866 | 0.11675759  | 0.12932263  | 0.097589634 | 0.13115059  |
| R1748114 | 3 | 0.08904757  | 0.104397126 | 0.43664768 | 0.08871448  | 0.10696631  | 0.06625556  | 0.1079712   |
| R1770216 | 3 | 0.067196965 | 0.08216451  | 0.56802195 | 0.06656958  | 0.084947824 | 0.045502618 | 0.085596606 |
| R1777884 | 5 | 0.063248344 | 0.079942174 | 0.5871301  | 0.062972315 | 0.08197648  | 0.04217563  | 0.08255486  |
| R1791486 | 5 | 0.10760435  | 0.12358778  | 0.32573086 | 0.107671075 | 0.12317606  | 0.08675872  | 0.12547117  |
| R1801421 | 1 | 0.07451746  | 0.090617135 | 0.52189213 | 0.07407221  | 0.09299623  | 0.052117452 | 0.09378738  |
| R1808099 | 5 | 0.04954953  | 0.064608954 | 0.67124355 | 0.049320642 | 0.06693771  | 0.031053541 | 0.06728602  |
| R1818882 | 3 | 0.03906115  | 0.052257508 | 0.7372652  | 0.03877227  | 0.05459736  | 0.023177993 | 0.05486856  |
| R1822146 | 4 | 0.07947662  | 0.09589981  | 0.49139777 | 0.07915498  | 0.09817995  | 0.056815162 | 0.099075764 |
| R1827081 | 4 | 0.109931156 | 0.12342646  | 0.31619582 | 0.10996082  | 0.12470087  | 0.08931997  | 0.12646493  |
| R1830086 | 3 | 0.05773422  | 0.07388209  | 0.6200961  | 0.057675146 | 0.07640799  | 0.037545945 | 0.07665858  |
| R1845714 | 5 | 0.037928287 | 0.050610013 | 0.7453287  | 0.037540264 | 0.05293787  | 0.022356376 | 0.053298473 |
| R1858719 | 1 | 0.10435414  | 0.11659327  | 0.35315347 | 0.10364595  | 0.11899426  | 0.082835875 | 0.12042306  |
| R1873450 | 4 | 0.07758159  | 0.09258589  | 0.5072547  | 0.076707944 | 0.09497667  | 0.054911174 | 0.095982    |
| R1888413 | 4 | 0.07817705  | 0.093448155 | 0.5021995  | 0.07757631  | 0.096103914 | 0.055503383 | 0.096991695 |
| R1901673 | 3 | 0.11215817  | 0.12171865  | 0.3094961  | 0.11222476  | 0.1256657   | 0.09217951  | 0.12655713  |
| R1924801 | 0 | 0.07587314  | 0.09194111  | 0.51415515 | 0.07535301  | 0.09415377  | 0.053409137 | 0.09511474  |
| R1933335 | 4 | 0.06163351  | 0.075214446 | 0.60571617 | 0.060455244 | 0.077723294 | 0.040650707 | 0.07860664  |

|          |   |             |             |            |             |             |             |             |
|----------|---|-------------|-------------|------------|-------------|-------------|-------------|-------------|
| R1944372 | 3 | 0.08981305  | 0.09892297  | 0.45004368 | 0.08752604  | 0.10241193  | 0.06697303  | 0.10430934  |
| R1954385 | 4 | 0.06809117  | 0.08469221  | 0.5594018  | 0.06757922  | 0.086535275 | 0.046376843 | 0.08732347  |
| R1956018 | 1 | 0.07446971  | 0.088406414 | 0.5288615  | 0.073274516 | 0.09098644  | 0.051978186 | 0.09202326  |
| R1956123 | 2 | 0.08860007  | 0.10228958  | 0.44541946 | 0.08738558  | 0.10458663  | 0.06564501  | 0.10607362  |
| R1956458 | 5 | 0.07251364  | 0.0873585   | 0.53837144 | 0.07144011  | 0.08949384  | 0.050228942 | 0.09059349  |
| R1969233 | 3 | 0.083170265 | 0.097343914 | 0.47599638 | 0.08215976  | 0.09986664  | 0.060336795 | 0.101126164 |
| R1977848 | 3 | 0.08978662  | 0.10317422  | 0.43823346 | 0.08874929  | 0.1058673   | 0.066932306 | 0.107256755 |
| R1980623 | 4 | 0.075152256 | 0.091010995 | 0.5186632  | 0.074673906 | 0.09350221  | 0.05269707  | 0.09430032  |
| R2006886 | 4 | 0.07797549  | 0.09123755  | 0.5099464  | 0.07658623  | 0.09386332  | 0.05528926  | 0.0951018   |
| R2031310 | 5 | 0.08488178  | 0.10109796  | 0.4611209  | 0.084158495 | 0.10266704  | 0.062073268 | 0.104000516 |
| R2041878 | 3 | 0.111310214 | 0.12161251  | 0.31664267 | 0.11025535  | 0.123454556 | 0.09128948  | 0.12543519  |
| R2045909 | 3 | 0.066138215 | 0.081467986 | 0.57352    | 0.06555991  | 0.084054515 | 0.04457262  | 0.084686704 |
| R2079629 | 4 | 0.07553086  | 0.088450916 | 0.5253459  | 0.074079745 | 0.091233835 | 0.0529462   | 0.09241252  |
| R2086195 | 5 | 0.09864876  | 0.11252986  | 0.38379657 | 0.097968355 | 0.1146099   | 0.07640178  | 0.116044775 |
| R2097247 | 2 | 0.09264838  | 0.1062854   | 0.42097664 | 0.09157677  | 0.108582735 | 0.06988684  | 0.110043265 |
| R2110067 | 5 | 0.07648205  | 0.0910591   | 0.5154276  | 0.075356625 | 0.09334128  | 0.05385188  | 0.09448144  |
| R2111091 | 4 | 0.044406593 | 0.05830441  | 0.7045075  | 0.044022925 | 0.0606298   | 0.027098296 | 0.06103043  |
| R2117075 | 5 | 0.08199782  | 0.09049976  | 0.49813664 | 0.07943373  | 0.094278775 | 0.059116937 | 0.09653637  |
| R2124216 | 3 | 0.061070956 | 0.07704663  | 0.601474   | 0.06076404  | 0.079425946 | 0.04032354  | 0.07989492  |
| R2140101 | 3 | 0.073550224 | 0.08730423  | 0.53433985 | 0.072430864 | 0.09019009  | 0.05109254  | 0.091092244 |
| R2144127 | 5 | 0.0511189   | 0.06726534  | 0.6592265  | 0.051079206 | 0.06936368  | 0.03232299  | 0.06962345  |
| R2157677 | 5 | 0.100561135 | 0.115165636 | 0.36924872 | 0.100523606 | 0.11738085  | 0.07855063  | 0.11856944  |
| R2166876 | 5 | 0.052856617 | 0.0669616   | 0.6549727  | 0.052191433 | 0.069447905 | 0.033561297 | 0.07000841  |
| R2167020 | 5 | 0.07747015  | 0.093607716 | 0.50355494 | 0.07723786  | 0.09628385  | 0.054879434 | 0.09696607  |
| R2169533 | 4 | 0.035901606 | 0.048585735 | 0.7566434  | 0.035713695 | 0.05103718  | 0.020921132 | 0.051197235 |
| R2171619 | 0 | 0.11505315  | 0.12678403  | 0.2894937  | 0.11499821  | 0.12789029  | 0.095915824 | 0.12986477  |
| R2197944 | 5 | 0.06908314  | 0.08453737  | 0.55636364 | 0.06836034  | 0.08681345  | 0.047185868 | 0.08765624  |
| R2212277 | 1 | 0.062208515 | 0.07854056  | 0.5934559  | 0.062065914 | 0.08107836  | 0.041230522 | 0.0814202   |
| R2237803 | 2 | 0.07270452  | 0.08722146  | 0.5375006  | 0.071713224 | 0.08971827  | 0.050424144 | 0.09071771  |
| R2264515 | 5 | 0.06268276  | 0.0784645   | 0.59300834 | 0.06217094  | 0.08067325  | 0.0416812   | 0.081319004 |
| R2272015 | 5 | 0.056677606 | 0.071859494 | 0.6296934  | 0.05618907  | 0.07419044  | 0.03667779  | 0.07471213  |
| R2303995 | 4 | 0.084828064 | 0.10125416  | 0.46044126 | 0.084286325 | 0.10296401  | 0.062052842 | 0.104173295 |
| R2343042 | 3 | 0.11464246  | 0.12739053  | 0.28921056 | 0.11497179  | 0.12815484  | 0.09544564  | 0.13018423  |
| R2346589 | 4 | 0.08977088  | 0.10419699  | 0.43533528 | 0.089055054 | 0.10678344  | 0.06692328  | 0.1079351   |
| R2347173 | 4 | 0.10891593  | 0.12029035  | 0.32654938 | 0.10860455  | 0.12303075  | 0.08824292  | 0.12436619  |
| R2359479 | 4 | 0.0843886   | 0.09626342  | 0.4751921  | 0.082766026 | 0.0993023   | 0.061410297 | 0.100677215 |
| R2367199 | 4 | 0.063252546 | 0.07839818  | 0.59113723 | 0.06264588  | 0.080956444 | 0.042087257 | 0.081522375 |
| R2372487 | 5 | 0.060668413 | 0.07637957  | 0.60445595 | 0.060335375 | 0.07895759  | 0.039879102 | 0.07932408  |
| R2373966 | 3 | 0.09871361  | 0.11411189  | 0.37846068 | 0.0987471   | 0.11608718  | 0.07655202  | 0.117327526 |
| R2385937 | 3 | 0.0850416   | 0.10066623  | 0.46191484 | 0.08413349  | 0.102286115 | 0.062246338 | 0.10371149  |
| R2396089 | 4 | 0.06397316  | 0.079562195 | 0.58669853 | 0.06319138  | 0.08147845  | 0.042768814 | 0.08232746  |
| R2397348 | 4 | 0.060374554 | 0.07595626  | 0.60713804 | 0.05985829  | 0.07822325  | 0.039679673 | 0.078769855 |
| R2398607 | 5 | 0.04632781  | 0.059473902 | 0.6952     | 0.04571992  | 0.06217208  | 0.028480344 | 0.06262592  |
| R2424757 | 5 | 0.08799425  | 0.10078381  | 0.45131838 | 0.0865845   | 0.103361614 | 0.06507489  | 0.10488257  |
| R2449163 | 3 | 0.08495769  | 0.10063891  | 0.46144608 | 0.084300004 | 0.10271274  | 0.062102143 | 0.10384241  |

|          |   |             |             |            |             |             |             |             |
|----------|---|-------------|-------------|------------|-------------|-------------|-------------|-------------|
| R2455930 | 3 | 0.050379995 | 0.06401505  | 0.67050534 | 0.049712043 | 0.06667438  | 0.0315623   | 0.067150824 |
| R2474257 | 6 | 0.059768625 | 0.075898744 | 0.60886735 | 0.05948074  | 0.07817281  | 0.039200157 | 0.07861161  |
| R2488731 | 5 | 0.0710763   | 0.08648755  | 0.5439338  | 0.07052463  | 0.08918706  | 0.04894323  | 0.089847386 |
| R2494273 | 4 | 0.0804232   | 0.09524077  | 0.4900922  | 0.0797173   | 0.09796394  | 0.057606034 | 0.098956615 |
| R2500527 | 4 | 0.09395127  | 0.10669885  | 0.4147904  | 0.09290227  | 0.10951717  | 0.07123308  | 0.11090697  |
| R2506056 | 3 | 0.06475503  | 0.0795481   | 0.58372223 | 0.063896045 | 0.0819005   | 0.04347065  | 0.08270742  |
| R2514881 | 2 | 0.0450136   | 0.059403777 | 0.6995507  | 0.04475391  | 0.061714716 | 0.027543502 | 0.062019814 |
| R2516394 | 5 | 0.047333628 | 0.06276148  | 0.68332756 | 0.047215246 | 0.06487427  | 0.029347243 | 0.06514062  |
| R2529284 | 0 | 0.07987187  | 0.09452195  | 0.4957654  | 0.078587    | 0.096294805 | 0.05721089  | 0.09774808  |
| R2543886 | 3 | 0.08604456  | 0.10044001  | 0.4583419  | 0.085083924 | 0.10277076  | 0.06316975  | 0.10414904  |
| R2554598 | 1 | 0.07498094  | 0.088857    | 0.52517575 | 0.07398169  | 0.09187451  | 0.052392412 | 0.09273763  |
| R2565200 | 4 | 0.090609424 | 0.10443941  | 0.43134758 | 0.08992729  | 0.10743739  | 0.06771811  | 0.108520806 |
| R2573360 | 4 | 0.09540174  | 0.10736344  | 0.40862504 | 0.09408174  | 0.11009677  | 0.07276771  | 0.11166361  |
| R2575548 | 4 | 0.09197244  | 0.10167628  | 0.4347388  | 0.09015485  | 0.10549594  | 0.069024205 | 0.106937505 |
| R2581860 | 2 | 0.0650193   | 0.0791637   | 0.58317673 | 0.064217165 | 0.082204014 | 0.043480575 | 0.08273856  |
| R2582129 | 3 | 0.09810816  | 0.11083624  | 0.38889244 | 0.09744777  | 0.11388467  | 0.075788304 | 0.115042485 |
| R2599360 | 4 | 0.07449093  | 0.090820834 | 0.52265567 | 0.07375991  | 0.09253083  | 0.05211545  | 0.0936264   |
| R2616766 | 5 | 0.06408462  | 0.07963561  | 0.5847009  | 0.06367144  | 0.08235028  | 0.042772897 | 0.082784235 |
| R2624931 | 4 | 0.06629735  | 0.08189674  | 0.57205373 | 0.06572649  | 0.08432044  | 0.044727027 | 0.084978245 |
| R2635318 | 5 | 0.057740208 | 0.07038517  | 0.63122594 | 0.056376122 | 0.07287759  | 0.037482407 | 0.07391267  |
| R2636782 | 3 | 0.017899815 | 0.026043072 | 0.8733186  | 0.01778136  | 0.02781716  | 0.009090061 | 0.028049927 |
| R2641525 | 3 | 0.08028468  | 0.0925033   | 0.4993182  | 0.07858766  | 0.09523068  | 0.05743286  | 0.09664256  |
| R2645096 | 2 | 0.062566295 | 0.07710196  | 0.5967067  | 0.06185598  | 0.07985308  | 0.04149087  | 0.08042514  |
| R2645101 | 4 | 0.08098787  | 0.09131132  | 0.50012153 | 0.078746416 | 0.09443725  | 0.058172233 | 0.09622339  |
| R2649907 | 4 | 0.07593415  | 0.08636729  | 0.52869314 | 0.07400186  | 0.09014274  | 0.053300768 | 0.091560096 |
| R2658091 | 4 | 0.027383009 | 0.039088294 | 0.8086456  | 0.027416646 | 0.041149218 | 0.015110021 | 0.04120719  |
| R2667630 | 3 | 0.087263666 | 0.10231262  | 0.44926837 | 0.08648598  | 0.10445356  | 0.06446008  | 0.10575566  |
| R2670295 | 5 | 0.08353416  | 0.09841921  | 0.47145823 | 0.08283552  | 0.101004936 | 0.06065562  | 0.102092355 |
| R2678902 | 3 | 0.07061522  | 0.08739585  | 0.54295427 | 0.07040608  | 0.08968136  | 0.048618298 | 0.09032891  |
| R2688135 | 4 | 0.08362288  | 0.09771616  | 0.4738852  | 0.082498915 | 0.10009939  | 0.060713965 | 0.101463504 |
| R2697774 | 4 | 0.072595775 | 0.087752074 | 0.5359809  | 0.07187952  | 0.090319455 | 0.050316617 | 0.09115566  |
| R2703808 | 3 | 0.084508166 | 0.09942618  | 0.4656826  | 0.08378753  | 0.101908736 | 0.061631516 | 0.10305524  |
| R2709337 | 5 | 0.057044856 | 0.072214514 | 0.6271263  | 0.056669362 | 0.07487929  | 0.036872655 | 0.07519304  |
| R2711188 | 3 | 0.06251321  | 0.076221615 | 0.60029346 | 0.061320275 | 0.07860385  | 0.041477256 | 0.079570286 |
| R2716798 | 5 | 0.050581843 | 0.0658112   | 0.66454315 | 0.05043191  | 0.068319134 | 0.03177653  | 0.068536244 |
| R2721311 | 4 | 0.04509932  | 0.05947592  | 0.698838   | 0.04489543  | 0.061921865 | 0.027607035 | 0.06216243  |
| R2731324 | 3 | 0.04856552  | 0.06318394  | 0.67776906 | 0.048370305 | 0.06584263  | 0.030205645 | 0.06606289  |
| R2731764 | 3 | 0.07425813  | 0.08985038  | 0.52510756 | 0.07359977  | 0.09217384  | 0.05189508  | 0.09311524  |
| R2732798 | 3 | 0.058235742 | 0.07255612  | 0.62316656 | 0.057430614 | 0.07506007  | 0.037844345 | 0.075706474 |
| R2735120 | 4 | 0.09989454  | 0.1162788   | 0.3699542  | 0.09994956  | 0.117256016 | 0.07782331  | 0.11884356  |
| R2752714 | 4 | 0.04922267  | 0.06367802  | 0.674441   | 0.04894916  | 0.066420436 | 0.030659834 | 0.066628926 |
| R2787688 | 5 | 0.08942325  | 0.104023166 | 0.4370479  | 0.088722154 | 0.10652271  | 0.06655886  | 0.10770199  |
| R2793780 | 3 | 0.06798567  | 0.08091091  | 0.56896067 | 0.066840485 | 0.084323    | 0.045985583 | 0.08499365  |
| R2803490 | 2 | 0.07693448  | 0.09195111  | 0.51086694 | 0.076105595 | 0.09443865  | 0.054283224 | 0.09541996  |
| R2807416 | 4 | 0.10773694  | 0.120200925 | 0.3322069  | 0.10724192  | 0.12207772  | 0.08681826  | 0.12371735  |

|          |   |             |             |            |             |             |             |             |
|----------|---|-------------|-------------|------------|-------------|-------------|-------------|-------------|
| R2809589 | 4 | 0.09132538  | 0.10370328  | 0.43286952 | 0.08975585  | 0.10600617  | 0.06854586  | 0.10779396  |
| R2859649 | 4 | 0.07814545  | 0.092605345 | 0.50548816 | 0.0770984   | 0.09498553  | 0.055488326 | 0.096188776 |
| R2880377 | 1 | 0.06962708  | 0.08636593  | 0.5493334  | 0.06929439  | 0.08846236  | 0.04774504  | 0.08917178  |
| R2881301 | 3 | 0.06357792  | 0.07933151  | 0.5875627  | 0.06310885  | 0.081705034 | 0.04242152  | 0.082292505 |
| R2895885 | 5 | 0.08309238  | 0.096223675 | 0.47890604 | 0.08194406  | 0.09923075  | 0.060177892 | 0.10042519  |
| R2903862 | 5 | 0.1053297   | 0.115937136 | 0.35185012 | 0.104130484 | 0.118585    | 0.08396254  | 0.120204985 |
| R2923773 | 5 | 0.11067187  | 0.11389861  | 0.33899665 | 0.10723661  | 0.117128484 | 0.09087014  | 0.12119759  |
| R2928383 | 4 | 0.090142936 | 0.10409396  | 0.4346773  | 0.08923357  | 0.10660013  | 0.067303896 | 0.10794828  |
| R2932087 | 4 | 0.06647067  | 0.08269144  | 0.56864893 | 0.06624491  | 0.08529589  | 0.044921596 | 0.08572655  |
| R2944503 | 3 | 0.10864512  | 0.11955131  | 0.3301875  | 0.107945524 | 0.122146465 | 0.08786939  | 0.12365471  |
| R2963600 | 4 | 0.09064225  | 0.10566579  | 0.42841727 | 0.090109594 | 0.10801774  | 0.06794211  | 0.1092053   |
| R2975126 | 5 | 0.07416034  | 0.08819222  | 0.53044146 | 0.07298396  | 0.09073222  | 0.051700678 | 0.09178914  |
| R2979477 | 1 | 0.09524519  | 0.105879076 | 0.41302606 | 0.09362843  | 0.1089352   | 0.07264168  | 0.1106444   |
| R2992930 | 5 | 0.043447718 | 0.057748966 | 0.70870036 | 0.043270707 | 0.060104508 | 0.026380718 | 0.060347103 |
| R3008520 | 4 | 0.10125806  | 0.103617944 | 0.39838663 | 0.09710209  | 0.1073326   | 0.07982386  | 0.11247878  |
| R3010591 | 5 | 0.09971548  | 0.11160419  | 0.38309163 | 0.098415986 | 0.11391897  | 0.07760275  | 0.11565093  |
| R3019567 | 5 | 0.03011669  | 0.041302882 | 0.79463565 | 0.029797865 | 0.043416355 | 0.016966078 | 0.0437645   |
| R3030177 | 4 | 0.079933494 | 0.09442724  | 0.4935252  | 0.07923988  | 0.09740733  | 0.05715548  | 0.09831133  |
| R3035452 | 4 | 0.12373814  | 0.13260198  | 0.2425591  | 0.12406077  | 0.13352107  | 0.10802283  | 0.1354962   |
| R3069627 | 4 | 0.027803931 | 0.039518096 | 0.8062528  | 0.027805092 | 0.04157362  | 0.015399436 | 0.041647084 |
| R3077672 | 5 | 0.07283261  | 0.088320605 | 0.53341526 | 0.07227562  | 0.09092161  | 0.050552767 | 0.09168156  |
| R3081601 | 0 | 0.083068594 | 0.09921168  | 0.47011748 | 0.08288761  | 0.1017887   | 0.06030054  | 0.10262545  |
| R3086211 | 5 | 0.08826954  | 0.10029048  | 0.45226327 | 0.086539574 | 0.1028502   | 0.06530442  | 0.10448251  |
| R3110303 | 4 | 0.08719226  | 0.10474127  | 0.44377008 | 0.086880915 | 0.10576612  | 0.06446539  | 0.10718401  |
| R3111222 | 4 | 0.041478135 | 0.055262152 | 0.7215674  | 0.041247856 | 0.057625707 | 0.02492548  | 0.057893235 |
| R3121235 | 4 | 0.09967108  | 0.108150214 | 0.39183122 | 0.09766672  | 0.11160601  | 0.077512205 | 0.113562495 |
| R3128463 | 4 | 0.08416733  | 0.09873666  | 0.46825957 | 0.083472185 | 0.10149789  | 0.06128229  | 0.10258403  |
| R3143439 | 3 | 0.10335624  | 0.11593065  | 0.35698682 | 0.10309028  | 0.118849665 | 0.081753254 | 0.120033145 |
| R3151599 | 5 | 0.08174746  | 0.096565336 | 0.48328012 | 0.08074873  | 0.09873949  | 0.05887635  | 0.10004256  |
| R3160138 | 1 | 0.058821373 | 0.074634254 | 0.6154434  | 0.058447205 | 0.076899216 | 0.0384068   | 0.0773478   |
| R3170141 | 4 | 0.11259433  | 0.12284244  | 0.30811253 | 0.11188178  | 0.12502223  | 0.09277391  | 0.12677276  |
| R3176125 | 3 | 0.07701286  | 0.09158633  | 0.5116707  | 0.07605544  | 0.09413054  | 0.05436084  | 0.09518329  |
| R3185659 | 1 | 0.119830735 | 0.12692067  | 0.2718591  | 0.11881111  | 0.12917496  | 0.10225349  | 0.13114996  |
| R3187497 | 4 | 0.11696963  | 0.12833908  | 0.27865177 | 0.11701829  | 0.12926173  | 0.098453395 | 0.13130607  |
| R3198654 | 4 | 0.05962318  | 0.07577862  | 0.6092747  | 0.059444793 | 0.078211    | 0.039102744 | 0.07856498  |
| R3201576 | 4 | 0.06432149  | 0.07963463  | 0.584396   | 0.06372571  | 0.082156576 | 0.04302109  | 0.08274446  |
| R3211474 | 4 | 0.06446714  | 0.07780486  | 0.5887378  | 0.06342782  | 0.08090917  | 0.043017115 | 0.08163612  |
| R3218482 | 4 | 0.085250854 | 0.100564495 | 0.46011728 | 0.08463571  | 0.102954656 | 0.062444903 | 0.10403197  |
| R3226437 | 4 | 0.05030685  | 0.06314499  | 0.6734069  | 0.049368452 | 0.06578794  | 0.031528775 | 0.066456154 |
| R3257830 | 3 | 0.0611435   | 0.076855436 | 0.6016065  | 0.060810287 | 0.0793721   | 0.040372934 | 0.07983929  |
| R3258204 | 5 | 0.075395994 | 0.09049136  | 0.51947683 | 0.0746689   | 0.093035705 | 0.052929446 | 0.09400176  |
| R3269356 | 4 | 0.09788923  | 0.112476856 | 0.38682377 | 0.09726536  | 0.114174575 | 0.07565872  | 0.11571145  |
| R3278000 | 3 | 0.05974409  | 0.076013915 | 0.6086504  | 0.05946862  | 0.07815732  | 0.03926844  | 0.07869724  |
| R3280186 | 2 | 0.096389204 | 0.11046465  | 0.39588237 | 0.09596069  | 0.11307663  | 0.0739939   | 0.11423248  |
| R3292822 | 4 | 0.10637649  | 0.11903358  | 0.3387832  | 0.10619985  | 0.12147347  | 0.085304804 | 0.12282854  |

|          |   |             |             |            |             |             |             |             |
|----------|---|-------------|-------------|------------|-------------|-------------|-------------|-------------|
| R3322663 | 4 | 0.08453029  | 0.0973708   | 0.47118366 | 0.083298914 | 0.10047111  | 0.061512113 | 0.10163312  |
| R3328752 | 2 | 0.07894077  | 0.093745865 | 0.4986913  | 0.07829521  | 0.096673995 | 0.05615199  | 0.09750083  |
| R3328867 | 3 | 0.108640596 | 0.12062975  | 0.32667294 | 0.10846736  | 0.123170495 | 0.08790627  | 0.12451254  |
| R3341095 | 4 | 0.04646866  | 0.061468903 | 0.6888512  | 0.04645371  | 0.06401269  | 0.028643752 | 0.06410108  |
| R3368249 | 4 | 0.095300205 | 0.10692053  | 0.4103165  | 0.09383357  | 0.10956924  | 0.072738975 | 0.111321    |
| R3381702 | 5 | 0.02974964  | 0.040822446 | 0.79710156 | 0.02941962  | 0.04291744  | 0.016706426 | 0.043282814 |
| R3383215 | 4 | 0.09544931  | 0.11210596  | 0.3963217  | 0.09524784  | 0.1131873   | 0.07300599  | 0.11468192  |
| R3391715 | 5 | 0.07708886  | 0.09343747  | 0.5063084  | 0.07659818  | 0.09554083  | 0.054524444 | 0.09650183  |
| R3400726 | 4 | 0.085521705 | 0.0967449   | 0.47025153 | 0.08374806  | 0.099846594 | 0.06253848  | 0.10134873  |
| R3408213 | 4 | 0.105248295 | 0.113854244 | 0.35707793 | 0.10373681  | 0.117250495 | 0.08385184  | 0.11898043  |
| R3426726 | 4 | 0.07974327  | 0.095469505 | 0.49193266 | 0.07918521  | 0.09782559  | 0.057044685 | 0.09879908  |
| R3435705 | 4 | 0.041795425 | 0.0555822   | 0.7196213  | 0.04157933  | 0.05800301  | 0.025171356 | 0.058247354 |
| R3438797 | 2 | 0.0918735   | 0.10757044  | 0.420028   | 0.09134967  | 0.10932535  | 0.0691637   | 0.11068926  |
| R3442506 | 3 | 0.10510753  | 0.11611035  | 0.35108614 | 0.104309514 | 0.11908708  | 0.08378812  | 0.12051129  |
| R3444124 | 4 | 0.10225684  | 0.11293999  | 0.36916044 | 0.101287    | 0.116298385 | 0.08039673  | 0.117660604 |
| R3445043 | 4 | 0.07836521  | 0.09704363  | 0.4929576  | 0.078347206 | 0.098189265 | 0.055875808 | 0.09922122  |
| R3450006 | 5 | 0.10705122  | 0.11879494  | 0.33821127 | 0.10632566  | 0.121011995 | 0.08599933  | 0.12260557  |
| R3452739 | 3 | 0.052866362 | 0.06704821  | 0.6542899  | 0.052333716 | 0.06975093  | 0.03353512  | 0.07017578  |
| R3477250 | 4 | 0.07929898  | 0.095404364 | 0.4942559  | 0.078638636 | 0.097315125 | 0.056620542 | 0.09846639  |
| R3485645 | 2 | 0.07863953  | 0.093185544 | 0.5018071  | 0.07775211  | 0.09586298  | 0.05588457  | 0.09686817  |
| R3509724 | 3 | 0.062184006 | 0.079414316 | 0.59232765 | 0.061939657 | 0.08111137  | 0.04130881  | 0.08171421  |
| R3518363 | 3 | 0.06050482  | 0.07488994  | 0.6095416  | 0.05971603  | 0.077527836 | 0.039706547 | 0.07811323  |
| R3529300 | 5 | 0.06670489  | 0.08203798  | 0.57101035 | 0.065905124 | 0.084213935 | 0.04508555  | 0.0850422   |
| R3535957 | 3 | 0.0424416   | 0.0559324   | 0.71668303 | 0.042113807 | 0.05847465  | 0.025593905 | 0.05876063  |
| R3553915 | 5 | 0.04752475  | 0.061862484 | 0.6851244  | 0.04714955  | 0.06427919  | 0.029416261 | 0.06464345  |
| R3579460 | 5 | 0.07574621  | 0.09082102  | 0.51711726 | 0.075119354 | 0.09357027  | 0.05320745  | 0.09441845  |
| R3589148 | 3 | 0.079465985 | 0.09503271  | 0.49459165 | 0.07870407  | 0.09713903  | 0.056776084 | 0.098290406 |
| R3596834 | 5 | 0.07362878  | 0.0870425   | 0.5347062  | 0.07246033  | 0.09007812  | 0.05113304  | 0.09095106  |
| R3607578 | 3 | 0.06239777  | 0.07800012  | 0.5946951  | 0.061970294 | 0.08046807  | 0.04143046  | 0.08103826  |
| R3623803 | 3 | 0.08356613  | 0.09973874  | 0.46813613 | 0.08309027  | 0.101831034 | 0.060764365 | 0.102873355 |
| R3631183 | 4 | 0.06019404  | 0.07619316  | 0.60642993 | 0.059945025 | 0.07866956  | 0.039545707 | 0.079022504 |
| R3661447 | 5 | 0.07751832  | 0.09048487  | 0.5141519  | 0.07588611  | 0.09289473  | 0.05480241  | 0.09426169  |
| R3707055 | 5 | 0.026411068 | 0.036235593 | 0.8193675  | 0.026125243 | 0.03856806  | 0.014423564 | 0.03886895  |
| R3722356 | 5 | 0.07134716  | 0.087867886 | 0.539749   | 0.07095647  | 0.09001515  | 0.049269926 | 0.09079434  |
| R3727306 | 5 | 0.059087723 | 0.074441426 | 0.61475974 | 0.05867459  | 0.07697268  | 0.03864989  | 0.077414036 |
| R3736725 | 4 | 0.07863897  | 0.09272598  | 0.5040499  | 0.077367686 | 0.09504435  | 0.05587685  | 0.09629621  |
| R3739042 | 5 | 0.086548105 | 0.1012211   | 0.45418417 | 0.085780405 | 0.103639856 | 0.06372046  | 0.1049059   |
| R3740754 | 4 | 0.051457968 | 0.066735126 | 0.65944326 | 0.051254373 | 0.06913498  | 0.032509312 | 0.069465    |
| R3741788 | 4 | 0.07708919  | 0.09044042  | 0.51422876 | 0.07593133  | 0.09348739  | 0.054372396 | 0.09445052  |
| R3744330 | 5 | 0.10454847  | 0.11461867  | 0.35646385 | 0.10365266  | 0.118166186 | 0.083058015 | 0.119492196 |
| R3757880 | 3 | 0.09239878  | 0.10622132  | 0.42229605 | 0.09126275  | 0.10825605  | 0.069723345 | 0.109841734 |
| R3769071 | 5 | 0.06606857  | 0.07749365  | 0.5857319  | 0.064140365 | 0.080310225 | 0.044479784 | 0.08177545  |
| R3769291 | 3 | 0.113879696 | 0.12186547  | 0.30476776 | 0.113054894 | 0.12526588  | 0.09440398  | 0.12676233  |
| R3776872 | 3 | 0.06294612  | 0.07947265  | 0.5891397  | 0.06269197  | 0.08167347  | 0.041911356 | 0.08216481  |
| R3784607 | 4 | 0.098700896 | 0.107188135 | 0.39749336 | 0.0967335   | 0.110820934 | 0.07638746  | 0.11267578  |

|          |   |             |             |            |             |             |             |             |
|----------|---|-------------|-------------|------------|-------------|-------------|-------------|-------------|
| R3811781 | 3 | 0.058696594 | 0.07308675  | 0.61968076 | 0.05806134  | 0.0759267   | 0.03816914  | 0.076378696 |
| R3814553 | 4 | 0.10606927  | 0.11674619  | 0.34707722 | 0.10496157  | 0.11941111  | 0.08479446  | 0.12094021  |
| R3825485 | 1 | 0.10634041  | 0.11685772  | 0.34517607 | 0.10538804  | 0.119796865 | 0.08517158  | 0.1212693   |
| R3837901 | 4 | 0.10062811  | 0.11555392  | 0.36793676 | 0.10070854  | 0.11772042  | 0.07858702  | 0.11886525  |
| R3840906 | 2 | 0.09027041  | 0.10411983  | 0.43521446 | 0.08904634  | 0.10617463  | 0.06744968  | 0.107724704 |
| R3844037 | 3 | 0.074341014 | 0.08579808  | 0.53549105 | 0.07271964  | 0.089499846 | 0.051659036 | 0.09049135  |
| R3857147 | 5 | 0.08084795  | 0.09310069  | 0.49532193 | 0.07929751  | 0.096135676 | 0.057941787 | 0.09735435  |
| R3857927 | 3 | 0.1019081   | 0.11379566  | 0.36875466 | 0.10099166  | 0.11645031  | 0.08015472  | 0.11794495  |
| R3863249 | 5 | 0.09350406  | 0.1073941   | 0.4136396  | 0.0929626   | 0.11035012  | 0.07079855  | 0.11135097  |
| R3864948 | 5 | 0.08013019  | 0.09364774  | 0.4958615  | 0.07896069  | 0.09651445  | 0.057275776 | 0.09760968  |
| R3867150 | 5 | 0.056804802 | 0.07139122  | 0.6300833  | 0.05628567  | 0.074174285 | 0.036694523 | 0.07456621  |
| R3874626 | 4 | 0.08680168  | 0.1000571   | 0.45710176 | 0.085512064 | 0.10260146  | 0.06386635  | 0.10405956  |
| R3877498 | 4 | 0.05004713  | 0.06404904  | 0.6713227  | 0.049511995 | 0.066654876 | 0.031326056 | 0.06708825  |
| R3883605 | 2 | 0.09080787  | 0.10585424  | 0.42781147 | 0.09015676  | 0.10800643  | 0.06810673  | 0.109256424 |
| R3884524 | 4 | 0.06181301  | 0.07749328  | 0.5980644  | 0.061377797 | 0.07993021  | 0.040892344 | 0.08042884  |
| R3898113 | 3 | 0.08949155  | 0.10320715  | 0.43873307 | 0.08864749  | 0.10600905  | 0.06663535  | 0.10727631  |
| R3898333 | 5 | 0.103486665 | 0.11480454  | 0.36241817 | 0.10199873  | 0.11674689  | 0.08192213  | 0.1186228   |
| R3900996 | 3 | 0.08317209  | 0.09639417  | 0.47876313 | 0.08188009  | 0.09907577  | 0.060303953 | 0.10041073  |
| R3910349 | 1 | 0.08435686  | 0.10011203  | 0.46267706 | 0.084326826 | 0.10318637  | 0.06150177  | 0.1038391   |
| R3917022 | 2 | 0.07116614  | 0.085516244 | 0.5466843  | 0.07025496  | 0.08831649  | 0.048971005 | 0.089090854 |
| R3922205 | 3 | 0.056076508 | 0.072362565 | 0.6298281  | 0.055975188 | 0.074613914 | 0.03621164  | 0.07493203  |
| R3927700 | 3 | 0.068631396 | 0.08355736  | 0.55994743 | 0.067918465 | 0.08627189  | 0.04672933  | 0.0869442   |
| R3937593 | 4 | 0.1128817   | 0.11081705  | 0.34100577 | 0.10717436  | 0.112516426 | 0.09442164  | 0.12118309  |
| R3938632 | 5 | 0.093127206 | 0.10744018  | 0.41647497 | 0.09218488  | 0.10945669  | 0.070401385 | 0.11091471  |
| R3948425 | 3 | 0.05935096  | 0.07573976  | 0.61054546 | 0.059151355 | 0.0779553   | 0.03889932  | 0.07835787  |
| R3978789 | 4 | 0.0896093   | 0.103260435 | 0.43841636 | 0.08868378  | 0.105988905 | 0.066728994 | 0.10731217  |
| R3984996 | 3 | 0.08369122  | 0.10043559  | 0.46518648 | 0.08354857  | 0.102629974 | 0.060966197 | 0.10354198  |
| R3987433 | 1 | 0.076673985 | 0.09145881  | 0.51345944 | 0.075673744 | 0.09377823  | 0.0540521   | 0.094903745 |
| R3997006 | 6 | 0.08562315  | 0.1009564   | 0.45818824 | 0.08494005  | 0.1031873   | 0.06275645  | 0.10434848  |
| R4005989 | 5 | 0.0990842   | 0.113959946 | 0.37853193 | 0.098709315 | 0.1156373   | 0.076962225 | 0.11711511  |
| R4014413 | 4 | 0.06092641  | 0.07627504  | 0.60419154 | 0.060426746 | 0.078779325 | 0.040130902 | 0.07927003  |
| R4021549 | 2 | 0.06942301  | 0.08368797  | 0.5575466  | 0.06841915  | 0.08629777  | 0.047441337 | 0.08718413  |
| R4022468 | 4 | 0.06425569  | 0.0772977   | 0.5915233  | 0.062959544 | 0.080081075 | 0.042860437 | 0.08102227  |
| R4042599 | 5 | 0.09313637  | 0.10586532  | 0.41958094 | 0.092108935 | 0.10879936  | 0.0703599   | 0.1101492   |
| R4047989 | 5 | 0.07853874  | 0.09472001  | 0.49742684 | 0.07821188  | 0.09722624  | 0.055857174 | 0.09801909  |
| R4053976 | 3 | 0.08213286  | 0.09579994  | 0.4842293  | 0.080813825 | 0.098230936 | 0.059220392 | 0.099572755 |
| R4077358 | 4 | 0.0904925   | 0.10453419  | 0.4320647  | 0.08968505  | 0.10716486  | 0.067648225 | 0.108410485 |
| R4078277 | 2 | 0.07073338  | 0.08684951  | 0.5444418  | 0.07025073  | 0.08914311  | 0.04869136  | 0.08989006  |
| R4087141 | 5 | 0.07738618  | 0.09176598  | 0.50960845 | 0.076485805 | 0.094517194 | 0.054737516 | 0.09549884  |
| R4087581 | 2 | 0.09784797  | 0.11172707  | 0.38757056 | 0.097440295 | 0.11434965  | 0.07555819  | 0.115506195 |
| R4119160 | 4 | 0.05865204  | 0.0742859   | 0.61672074 | 0.058285955 | 0.0766674   | 0.03829472  | 0.0770933   |
| R4124678 | 5 | 0.082366504 | 0.09576616  | 0.48255706 | 0.08127105  | 0.09870928  | 0.05948957  | 0.09984034  |
| R4147686 | 3 | 0.0650262   | 0.0815603   | 0.5766777  | 0.0647902   | 0.0838761   | 0.043688986 | 0.08438061  |
| R4174623 | 3 | 0.06860302  | 0.0838068   | 0.55961907 | 0.06788943  | 0.08625208  | 0.046775755 | 0.08705379  |
| R4182458 | 4 | 0.077979    | 0.09312698  | 0.50412464 | 0.07723585  | 0.09562209  | 0.055310898 | 0.09660055  |

|          |   |             |             |            |             |             |             |             |
|----------|---|-------------|-------------|------------|-------------|-------------|-------------|-------------|
| R4196592 | 5 | 0.07958865  | 0.094616316 | 0.495835   | 0.078565925 | 0.09666849  | 0.056814577 | 0.097911015 |
| R4197631 | 4 | 0.07855731  | 0.092931904 | 0.50298095 | 0.07756211  | 0.095474415 | 0.0558866   | 0.09660667  |
| R4226008 | 4 | 0.09063109  | 0.096675314 | 0.45359248 | 0.08722864  | 0.100209974 | 0.06800519  | 0.103657335 |
| R4240155 | 5 | 0.031780034 | 0.04357994  | 0.78282243 | 0.031616673 | 0.046030313 | 0.018028662 | 0.046141915 |
| R4241294 | 3 | 0.11257358  | 0.12621345  | 0.30016512 | 0.11278003  | 0.12669611  | 0.09284627  | 0.12872544  |
| R4242008 | 3 | 0.098071806 | 0.11240537  | 0.3859615  | 0.09751652  | 0.11441685  | 0.07583259  | 0.11579531  |
| R4242773 | 3 | 0.09651573  | 0.110138476 | 0.3969352  | 0.09578206  | 0.112617634 | 0.07409588  | 0.11391501  |
| R4249236 | 3 | 0.06388215  | 0.07840142  | 0.5891834  | 0.06309236  | 0.0810947   | 0.04261525  | 0.08173068  |
| R4254299 | 4 | 0.03423219  | 0.046415538 | 0.7679721  | 0.0339338   | 0.048745494 | 0.019714275 | 0.0489866   |
| R4260171 | 1 | 0.10601066  | 0.120669834 | 0.3357984  | 0.10646667  | 0.122432336 | 0.08474616  | 0.12387597  |
| R4266155 | 1 | 0.029117534 | 0.042010713 | 0.79553795 | 0.029281959 | 0.043875042 | 0.016296662 | 0.04388014  |
| R4266820 | 3 | 0.09179064  | 0.105696    | 0.4254543  | 0.090755254 | 0.10794935  | 0.06897427  | 0.10938014  |
| R4276053 | 3 | 0.052447163 | 0.06588102  | 0.6590886  | 0.05165124  | 0.06857098  | 0.03318951  | 0.06917154  |
| R4289838 | 4 | 0.042812604 | 0.057412956 | 0.7114669  | 0.042754013 | 0.059745084 | 0.025906064 | 0.05990238  |
| R4290655 | 2 | 0.08764537  | 0.09667929  | 0.46340156 | 0.08524362  | 0.10017226  | 0.064780876 | 0.10207705  |
| R4292728 | 3 | 0.08978201  | 0.104685016 | 0.4337491  | 0.089248635 | 0.10719415  | 0.06701439  | 0.10832671  |
| R4323608 | 3 | 0.11094484  | 0.12252653  | 0.31487846 | 0.110461526 | 0.12439388  | 0.09070995  | 0.12608479  |
| R4332132 | 4 | 0.04557258  | 0.059836347 | 0.69647485 | 0.04530266  | 0.062281907 | 0.027950725 | 0.0625809   |
| R4345802 | 4 | 0.092751294 | 0.10581044  | 0.42039067 | 0.09196895  | 0.10896539  | 0.06998297  | 0.11013029  |
| R4379962 | 5 | 0.08091294  | 0.09588258  | 0.48683235 | 0.08022581  | 0.09855475  | 0.05807165  | 0.099519834 |
| R4388056 | 4 | 0.056666765 | 0.07214116  | 0.62894714 | 0.056264617 | 0.074403934 | 0.036676116 | 0.07490021  |
| R4415805 | 3 | 0.061778456 | 0.076784626 | 0.5996917  | 0.06128885  | 0.07962554  | 0.040803377 | 0.080027446 |
| R4439627 | 2 | 0.027963176 | 0.038632944 | 0.80880386 | 0.027605906 | 0.040505096 | 0.015516938 | 0.040971994 |
| R4470253 | 5 | 0.11025161  | 0.12549426  | 0.3091211  | 0.111165844 | 0.12604673  | 0.090000525 | 0.1279199   |
| R4480046 | 5 | 0.016434442 | 0.025026374 | 0.88039315 | 0.01652244  | 0.026694905 | 0.008229348 | 0.026699355 |
| R4482444 | 3 | 0.10514243  | 0.12018707  | 0.34066552 | 0.10545692  | 0.121639654 | 0.08374178  | 0.12316662  |
| R4527133 | 2 | 0.039608937 | 0.053776696 | 0.73136914 | 0.039546624 | 0.0559696   | 0.023585558 | 0.05614341  |
| R4531942 | 0 | 0.08323008  | 0.09607381  | 0.47850642 | 0.08211472  | 0.09948725  | 0.060150173 | 0.100437574 |
| R4536332 | 4 | 0.057407703 | 0.07285639  | 0.6245734  | 0.056997932 | 0.07522192  | 0.037282337 | 0.07566028  |
| R4542109 | 4 | 0.088765234 | 0.10148228  | 0.44738647 | 0.08721444  | 0.103827186 | 0.06581616  | 0.10550829  |
| R4567280 | 2 | 0.07986545  | 0.09434941  | 0.49500746 | 0.07887143  | 0.09680719  | 0.05710892  | 0.09799012  |
| R4575675 | 1 | 0.100939155 | 0.11218815  | 0.3761272  | 0.099901445 | 0.115236096 | 0.078921415 | 0.11668652  |
| R4580743 | 4 | 0.055997122 | 0.07083916  | 0.63451934 | 0.05546466  | 0.07326855  | 0.0361059   | 0.07380528  |
| R4581557 | 4 | 0.06595419  | 0.07927054  | 0.58053184 | 0.0647648   | 0.08208091  | 0.04437458  | 0.08302312  |
| R4583840 | 4 | 0.08795922  | 0.09755762  | 0.46047089 | 0.08560125  | 0.10069315  | 0.065118186 | 0.10259966  |
| R4590536 | 4 | 0.09330193  | 0.106086425 | 0.41987294 | 0.09188129  | 0.10832203  | 0.070510544 | 0.11002487  |
| R4597099 | 3 | 0.09180641  | 0.104046345 | 0.43017656 | 0.09026207  | 0.10645232  | 0.06904715  | 0.108209215 |
| R4600026 | 4 | 0.07202955  | 0.08789554  | 0.5378427  | 0.07138453  | 0.090060435 | 0.04985174  | 0.090935566 |
| R4602424 | 3 | 0.08981275  | 0.103356026 | 0.43741006 | 0.08888284  | 0.10613423  | 0.06695334  | 0.107450806 |
| R4619330 | 4 | 0.07137549  | 0.08698022  | 0.5417477  | 0.07084497  | 0.08954553  | 0.049231343 | 0.09027464  |
| R4620717 | 4 | 0.09306024  | 0.10643253  | 0.41975302 | 0.09176621  | 0.108436756 | 0.07041781  | 0.11013339  |
| R4637403 | 3 | 0.115983754 | 0.12715876  | 0.28388524 | 0.116294324 | 0.1289095   | 0.097186476 | 0.13058197  |
| R4641987 | 3 | 0.07975889  | 0.09362719  | 0.49770465 | 0.07850132  | 0.09609567  | 0.056974802 | 0.097337484 |
| R4657974 | 4 | 0.09218179  | 0.10312281  | 0.4324574  | 0.09006149  | 0.10545318  | 0.069303714 | 0.10741959  |
| R4705333 | 5 | 0.09179327  | 0.10552476  | 0.42674762 | 0.090471454 | 0.1073931   | 0.06896436  | 0.109105386 |

|          |   |             |             |            |             |             |             |             |
|----------|---|-------------|-------------|------------|-------------|-------------|-------------|-------------|
| R4739508 | 3 | 0.10119379  | 0.11558985  | 0.3669817  | 0.10081501  | 0.11734329  | 0.07923182  | 0.11884451  |
| R4744901 | 4 | 0.06356849  | 0.07862086  | 0.5898207  | 0.06286352  | 0.08103479  | 0.04241174  | 0.081679866 |
| R4745715 | 2 | 0.07251008  | 0.08797576  | 0.53580314 | 0.0718323   | 0.09038193  | 0.05024987  | 0.091246895 |
| R4762074 | 2 | 0.06246207  | 0.07679058  | 0.5981755  | 0.06162695  | 0.07939586  | 0.04143981  | 0.080109164 |
| R4790045 | 4 | 0.05725533  | 0.07041611  | 0.63224775 | 0.056129254 | 0.07304433  | 0.03704469  | 0.07386251  |
| R4817881 | 4 | 0.07699998  | 0.09293598  | 0.50769365 | 0.07648133  | 0.09525862  | 0.0544501   | 0.09618033  |
| R4841941 | 1 | 0.07437369  | 0.09128322  | 0.52036816 | 0.07417313  | 0.093501635 | 0.052052643 | 0.09424754  |
| R4847810 | 4 | 0.087085076 | 0.09981847  | 0.4576811  | 0.085432336 | 0.102025695 | 0.0641911   | 0.10376618  |
| R4854051 | 5 | 0.06346664  | 0.076145865 | 0.59669036 | 0.062189113 | 0.07918915  | 0.042228427 | 0.08009049  |
| R4859661 | 3 | 0.075286046 | 0.09101786  | 0.51844674 | 0.07471561  | 0.09342173  | 0.052819643 | 0.09429245  |
| R4894433 | 5 | 0.02702153  | 0.037781324 | 0.813743   | 0.026775662 | 0.039729036 | 0.014892359 | 0.040057044 |
| R4897970 | 5 | 0.03488082  | 0.046002693 | 0.7669619  | 0.03437064  | 0.04861775  | 0.020130629 | 0.04903564  |
| R4900012 | 3 | 0.08737661  | 0.097179376 | 0.4631994  | 0.08513825  | 0.10042756  | 0.064425945 | 0.10225282  |
| R4903779 | 3 | 0.042316522 | 0.05651508  | 0.7154783  | 0.042175196 | 0.0588916   | 0.02553098  | 0.05909232  |
| R4906216 | 4 | 0.08173862  | 0.096897975 | 0.48106173 | 0.08120011  | 0.0996151   | 0.058918335 | 0.1005682   |
| R4917253 | 2 | 0.08531419  | 0.09879044  | 0.4649256  | 0.08420335  | 0.1015888   | 0.0623365   | 0.10284108  |
| R4927046 | 5 | 0.067778856 | 0.08424713  | 0.56174237 | 0.067204    | 0.085998654 | 0.04614713  | 0.08688191  |
| R4928630 | 2 | 0.091125496 | 0.10711989  | 0.42467698 | 0.09037567  | 0.10834618  | 0.06846585  | 0.10988994  |
| R4935546 | 1 | 0.09219323  | 0.10732513  | 0.4175387  | 0.09214536  | 0.11022334  | 0.0695271   | 0.111047216 |
| R4937504 | 5 | 0.06926884  | 0.0842767   | 0.5558709  | 0.0685943   | 0.08698477  | 0.047302123 | 0.08770237  |
| R4956716 | 2 | 0.07307319  | 0.08902516  | 0.53083956 | 0.07259858  | 0.091463655 | 0.05077934  | 0.092220515 |
| R4976287 | 4 | 0.06558275  | 0.081932195 | 0.5739883  | 0.06526791  | 0.08423604  | 0.044181004 | 0.08481171  |
| R4981575 | 4 | 0.06824177  | 0.082305945 | 0.56526864 | 0.06714369  | 0.084815875 | 0.046462968 | 0.085761085 |
| R4986745 | 4 | 0.057102364 | 0.0724108   | 0.6267768  | 0.056671027 | 0.07480314  | 0.036964443 | 0.07527139  |
| R4990009 | 4 | 0.062204856 | 0.076953836 | 0.59793776 | 0.061633162 | 0.079830766 | 0.04115134  | 0.08028821  |
| R4996203 | 4 | 0.093165755 | 0.107226126 | 0.41573262 | 0.09250278  | 0.109867536 | 0.070458986 | 0.11104621  |
| R5004746 | 4 | 0.0698946   | 0.08454214  | 0.5542093  | 0.068844914 | 0.08681666  | 0.04787846  | 0.08781392  |
| R5026720 | 4 | 0.06821353  | 0.082796894 | 0.56357133 | 0.06736311  | 0.08546394  | 0.04635808  | 0.0862331   |
| R5031238 | 5 | 0.07669948  | 0.09188529  | 0.5114041  | 0.07602821  | 0.094546735 | 0.05405541  | 0.09538082  |
| R5053212 | 3 | 0.07165001  | 0.0877304   | 0.53906494 | 0.071161844 | 0.090038456 | 0.049513277 | 0.09084106  |
| R5061712 | 3 | 0.10925793  | 0.11623612  | 0.33781317 | 0.1072031   | 0.11918259  | 0.08880394  | 0.12150317  |
| R5064479 | 4 | 0.020996252 | 0.031210404 | 0.84956986 | 0.021116775 | 0.03306036  | 0.01100885  | 0.033037417 |
| R5079107 | 3 | 0.09707492  | 0.11190403  | 0.38941506 | 0.0969924   | 0.1144253   | 0.07472196  | 0.11546629  |
| R5079327 | 4 | 0.11420634  | 0.12270664  | 0.30254307 | 0.11318732  | 0.12528622  | 0.09493938  | 0.12713102  |
| R5082982 | 5 | 0.05130359  | 0.06502563  | 0.66532177 | 0.050522175 | 0.067421064 | 0.032338303 | 0.068067364 |
| R5098644 | 5 | 0.11870653  | 0.12831801  | 0.27237782 | 0.11838402  | 0.12972668  | 0.10075332  | 0.13173357  |
| R5126867 | 4 | 0.057178464 | 0.071590334 | 0.62855476 | 0.056559388 | 0.07430458  | 0.037019167 | 0.07479327  |
| R5131375 | 3 | 0.11334837  | 0.1268798   | 0.29417673 | 0.114131235 | 0.12787953  | 0.093856975 | 0.1297274   |
| R5133113 | 4 | 0.07075036  | 0.08253664  | 0.55735815 | 0.0688219   | 0.08520769  | 0.048631977 | 0.0866933   |
| R5138383 | 5 | 0.0381135   | 0.05100714  | 0.74377656 | 0.037745543 | 0.053247884 | 0.022493407 | 0.053616002 |
| R5158294 | 4 | 0.094676465 | 0.10800513  | 0.40873456 | 0.09383534  | 0.110712804 | 0.072044075 | 0.11199157  |
| R5177066 | 3 | 0.12850688  | 0.13286828  | 0.22417594 | 0.12810719  | 0.13483036  | 0.114885785 | 0.13662565  |
| R5184427 | 5 | 0.0688896   | 0.083761245 | 0.55896133 | 0.06805658  | 0.08622945  | 0.04701713  | 0.08708467  |
| R5188003 | 4 | 0.031735424 | 0.044731356 | 0.77974546 | 0.031874    | 0.046983372 | 0.018002981 | 0.046927284 |
| R5196723 | 1 | 0.078182116 | 0.0917077   | 0.5079552  | 0.07685649  | 0.09432362  | 0.055463348 | 0.095511615 |

|          |   |             |             |            |             |             |             |             |
|----------|---|-------------|-------------|------------|-------------|-------------|-------------|-------------|
| R5203116 | 4 | 0.073997125 | 0.08878673  | 0.52925724 | 0.07303393  | 0.09117443  | 0.05156476  | 0.092185795 |
| R5203336 | 5 | 0.07885083  | 0.09276193  | 0.50282824 | 0.07766907  | 0.09533177  | 0.056073185 | 0.09648492  |
| R5210462 | 3 | 0.109767266 | 0.12298718  | 0.3169105  | 0.11001141  | 0.12479917  | 0.08918576  | 0.12633869  |
| R5211056 | 5 | 0.05125827  | 0.06821978  | 0.6569503  | 0.051203877 | 0.0697077   | 0.03247753  | 0.07018257  |
| R5214048 | 5 | 0.08032403  | 0.09539529  | 0.49135482 | 0.0793016   | 0.09741391  | 0.057513237 | 0.09869709  |
| R5221394 | 1 | 0.08115646  | 0.095962696 | 0.48611018 | 0.08034748  | 0.09851292  | 0.058326185 | 0.09958407  |
| R5225865 | 4 | 0.0821303   | 0.098742776 | 0.47600102 | 0.08160757  | 0.10048919  | 0.059401423 | 0.10162768  |
| R5234179 | 3 | 0.09239986  | 0.1072339   | 0.41824052 | 0.09191719  | 0.10966913  | 0.06974683  | 0.11079263  |
| R5256488 | 4 | 0.048490617 | 0.06345544  | 0.6776318  | 0.048292484 | 0.065810524 | 0.030204576 | 0.06611452  |
| R5259690 | 3 | 0.08892983  | 0.10361072  | 0.43991005 | 0.088185534 | 0.10597495  | 0.06614402  | 0.10724486  |
| R5274446 | 5 | 0.10530491  | 0.11733653  | 0.34805745 | 0.104543395 | 0.119526766 | 0.084081195 | 0.12114974  |
| R5280213 | 3 | 0.0273632   | 0.038658317 | 0.81001025 | 0.027271999 | 0.04071055  | 0.015108042 | 0.04087751  |
| R5294357 | 2 | 0.09542564  | 0.10694173  | 0.4107165  | 0.09370479  | 0.10926321  | 0.07278494  | 0.11116319  |
| R5313591 | 3 | 0.08359032  | 0.09516634  | 0.4813393  | 0.081733935 | 0.09795518  | 0.0607042   | 0.09951082  |
| R5321546 | 2 | 0.039056845 | 0.050878093 | 0.74107504 | 0.03843337  | 0.053444106 | 0.02314947  | 0.05396308  |
| R5334541 | 3 | 0.065977775 | 0.0829344   | 0.570031   | 0.065805554 | 0.08506317  | 0.044555817 | 0.08563229  |
| R5356410 | 4 | 0.08732065  | 0.101084016 | 0.4518221  | 0.08639609  | 0.10395252  | 0.0642989   | 0.10512577  |
| R5357999 | 4 | 0.075881824 | 0.09140723  | 0.51578444 | 0.075166196 | 0.09372846  | 0.053344335 | 0.09468743  |
| R5369295 | 5 | 0.1173489   | 0.12724145  | 0.2788643  | 0.11735879  | 0.12930244  | 0.09891025  | 0.13097385  |
| R5374583 | 1 | 0.07582263  | 0.09298403  | 0.51134354 | 0.07561293  | 0.09501566  | 0.053396396 | 0.095824756 |
| R5379193 | 5 | 0.061600517 | 0.07632814  | 0.6025695  | 0.060776554 | 0.0786862   | 0.040685907 | 0.07935312  |
| R5385855 | 5 | 0.07059484  | 0.085420676 | 0.54880965 | 0.06978955  | 0.08808046  | 0.048479065 | 0.08882579  |
| R5405023 | 5 | 0.06704741  | 0.08146075  | 0.5711607  | 0.06610401  | 0.0840072   | 0.045382354 | 0.08483759  |
| R5407536 | 5 | 0.09785454  | 0.10877422  | 0.39812773 | 0.09591604  | 0.11082074  | 0.07550627  | 0.11300042  |
| R5415701 | 0 | 0.09252106  | 0.10627479  | 0.42074823 | 0.09166978  | 0.10884604  | 0.06978321  | 0.11015689  |
| R5443007 | 5 | 0.04378155  | 0.056857124 | 0.7107217  | 0.043127984 | 0.059167612 | 0.026627183 | 0.05971689  |
| R5447358 | 3 | 0.097056456 | 0.11158831  | 0.39014953 | 0.09695116  | 0.1143237   | 0.07464166  | 0.11528921  |
| R5449861 | 4 | 0.035938025 | 0.049597193 | 0.75392216 | 0.03594817  | 0.051756755 | 0.02095267  | 0.05188497  |
| R5454379 | 3 | 0.08679022  | 0.09740724  | 0.46375227 | 0.0849966   | 0.1008841   | 0.06380749  | 0.1023621   |
| R5459434 | 1 | 0.05053735  | 0.064908326 | 0.66712683 | 0.05017155  | 0.06765829  | 0.031686638 | 0.06791107  |
| R5483154 | 3 | 0.09391948  | 0.106038295 | 0.4173388  | 0.09252048  | 0.10869416  | 0.071164824 | 0.11032402  |
| R5486471 | 3 | 0.13772772  | 0.14479072  | 0.16211514 | 0.13862889  | 0.14171709  | 0.1306226   | 0.14439784  |
| R5489358 | 4 | 0.07872933  | 0.0921268   | 0.50476694 | 0.07746026  | 0.09491223  | 0.055951003 | 0.09605345  |
| R5499256 | 4 | 0.094100356 | 0.10551033  | 0.4172389  | 0.09281775  | 0.108816676 | 0.07132461  | 0.110191345 |
| R5505495 | 5 | 0.06979335  | 0.08186454  | 0.5619448  | 0.0680491   | 0.084670044 | 0.04774196  | 0.08593625  |
| R5508047 | 4 | 0.10198867  | 0.11484945  | 0.36517593 | 0.10152241  | 0.11757387  | 0.0801096   | 0.11878003  |
| R5518725 | 5 | 0.07804497  | 0.095134735 | 0.4990095  | 0.07763311  | 0.09683325  | 0.055454303 | 0.097890094 |
| R5525186 | 5 | 0.05711223  | 0.07304889  | 0.62476385 | 0.05689562  | 0.07539154  | 0.03705159  | 0.075736314 |
| R5533791 | 4 | 0.06609712  | 0.07953444  | 0.5793572  | 0.06494927  | 0.08234664  | 0.0445193   | 0.08319602  |
| R5541746 | 1 | 0.08021986  | 0.08713306  | 0.5135572  | 0.07697312  | 0.09057323  | 0.057503115 | 0.094040416 |
| R5546461 | 3 | 0.062330075 | 0.07692556  | 0.5981759  | 0.061564602 | 0.0795341   | 0.041296054 | 0.080173805 |
| R5557408 | 5 | 0.074195534 | 0.09014104  | 0.52447635 | 0.073641926 | 0.09242885  | 0.051824305 | 0.09329203  |
| R5563835 | 4 | 0.11147707  | 0.12208664  | 0.3141193  | 0.110751465 | 0.12418514  | 0.09139217  | 0.1259882   |
| R5565908 | 3 | 0.09875506  | 0.11147853  | 0.38568076 | 0.097923376 | 0.114163525 | 0.07652919  | 0.1154696   |
| R5573393 | 5 | 0.024468992 | 0.03410314  | 0.83169085 | 0.02413192  | 0.035947412 | 0.013226958 | 0.03643066  |

|          |   |             |             |            |             |             |             |             |
|----------|---|-------------|-------------|------------|-------------|-------------|-------------|-------------|
| R5574987 | 3 | 0.080872566 | 0.09528323  | 0.4886973  | 0.080007024 | 0.098072655 | 0.057997867 | 0.099069275 |
| R5589495 | 5 | 0.121758714 | 0.1285001   | 0.2620118  | 0.12043387  | 0.13001287  | 0.10492608  | 0.13235655  |
| R5629689 | 4 | 0.056262784 | 0.07070421  | 0.6339949  | 0.055628683 | 0.073286526 | 0.036313843 | 0.07380915  |
| R5636935 | 2 | 0.109905005 | 0.12255133  | 0.31825086 | 0.109724745 | 0.12421745  | 0.089420564 | 0.12593004  |
| R5647192 | 4 | 0.10591604  | 0.11836931  | 0.3432467  | 0.105314635 | 0.120419025 | 0.084689364 | 0.12204493  |
| R5656511 | 3 | 0.110391386 | 0.12192276  | 0.3170841  | 0.110252716 | 0.12441196  | 0.09006909  | 0.12586801  |
| R5676537 | 5 | 0.064053446 | 0.08039239  | 0.58299565 | 0.06376435  | 0.08271718  | 0.042839132 | 0.083237804 |
| R5681710 | 5 | 0.056851942 | 0.07227821  | 0.62822634 | 0.056379456 | 0.07446234  | 0.03682067  | 0.07498109  |
| R5683778 | 3 | 0.05723533  | 0.072280884 | 0.626851   | 0.056687627 | 0.07468867  | 0.037075344 | 0.075181186 |
| R5690684 | 5 | 0.07001728  | 0.082668036 | 0.5584143  | 0.06861682  | 0.085696496 | 0.047922026 | 0.086665116 |
| R5691943 | 5 | 0.035434153 | 0.049553573 | 0.7558003  | 0.035525437 | 0.051463682 | 0.020642182 | 0.05158059  |
| R5693901 | 5 | 0.09404624  | 0.108358584 | 0.40944433 | 0.09355916  | 0.11095816  | 0.071529016 | 0.1121045   |
| R5694375 | 4 | 0.08084989  | 0.096416496 | 0.485572   | 0.080311514 | 0.098851115 | 0.058127414 | 0.09987154  |
| R5739959 | 1 | 0.06359478  | 0.07919325  | 0.58792484 | 0.06307319  | 0.081575945 | 0.042434454 | 0.0822035   |
| R5741580 | 2 | 0.04534006  | 0.05816507  | 0.7014744  | 0.044773225 | 0.061079487 | 0.027717207 | 0.06145057  |
| R5766881 | 4 | 0.054827917 | 0.07047877  | 0.6388871  | 0.054600686 | 0.07282145  | 0.035195462 | 0.07318857  |
| R5789564 | 4 | 0.08258971  | 0.09723633  | 0.47793978 | 0.081762865 | 0.09980309  | 0.05973145  | 0.1009369   |
| R5795331 | 4 | 0.070365556 | 0.08433869  | 0.55238855 | 0.06939032  | 0.087232575 | 0.048277956 | 0.08800631  |
| R5816648 | 3 | 0.06405479  | 0.07824284  | 0.5892217  | 0.06314043  | 0.080861226 | 0.04280346  | 0.081675485 |
| R5850046 | 1 | 0.07557523  | 0.09231473  | 0.5135259  | 0.07538584  | 0.09467724  | 0.053139642 | 0.095381446 |
| R5862122 | 5 | 0.030763505 | 0.04198319  | 0.790774   | 0.030419767 | 0.04417076  | 0.017365778 | 0.044523023 |
| R5879363 | 3 | 0.06516734  | 0.07721712  | 0.58869195 | 0.063600585 | 0.080278315 | 0.04364152  | 0.08140315  |
| R5883172 | 2 | 0.07161114  | 0.085761435 | 0.5448732  | 0.070573166 | 0.088475585 | 0.049362883 | 0.08934264  |
| R5893965 | 4 | 0.05452215  | 0.069958776 | 0.6411497  | 0.054274734 | 0.072424926 | 0.034914725 | 0.07275501  |
| R5907586 | 4 | 0.07340319  | 0.089635104 | 0.5281426  | 0.07298814  | 0.09194799  | 0.051145475 | 0.09273754  |
| R5924065 | 4 | 0.093748115 | 0.1068327   | 0.41586205 | 0.092560396 | 0.10919565  | 0.07106738  | 0.110733666 |
| R5927382 | 3 | 0.08348318  | 0.09858415  | 0.4707677  | 0.08294636  | 0.1012772   | 0.060640775 | 0.10230059  |
| R5935442 | 3 | 0.07633287  | 0.091237046 | 0.5152793  | 0.0753285   | 0.09346867  | 0.053744078 | 0.094609536 |
| R5936361 | 5 | 0.09241202  | 0.10417921  | 0.42774564 | 0.0907768   | 0.106738314 | 0.06967206  | 0.10847597  |
| R5955028 | 5 | 0.08000812  | 0.09467069  | 0.493487   | 0.07911115  | 0.097206034 | 0.057219487 | 0.09829752  |
| R5965031 | 5 | 0.07130486  | 0.085580766 | 0.5460599  | 0.07037386  | 0.088397525 | 0.049075678 | 0.08920744  |
| R5972272 | 5 | 0.09761047  | 0.11233315  | 0.38752335 | 0.09721798  | 0.11434846  | 0.0753268   | 0.115639724 |
| R5973191 | 2 | 0.07677474  | 0.09230594  | 0.51032245 | 0.076100424 | 0.094683826 | 0.05419777  | 0.09561486  |
| R5992638 | 4 | 0.105467916 | 0.11614768  | 0.34969878 | 0.10462727  | 0.119292066 | 0.08414052  | 0.12062577  |
| R6001210 | 3 | 0.07677361  | 0.09218114  | 0.5105932  | 0.07609309  | 0.09466535  | 0.054137602 | 0.095556065 |
| R6003498 | 4 | 0.0674662   | 0.08382133  | 0.5626071  | 0.06720768  | 0.08631756  | 0.04576698  | 0.08681318  |
| R6013281 | 3 | 0.09012519  | 0.10709976  | 0.4276027  | 0.08977062  | 0.1082759   | 0.06744649  | 0.109679356 |
| R6057469 | 4 | 0.0617573   | 0.077882335 | 0.5971241  | 0.061442714 | 0.08024756  | 0.040831354 | 0.08071459  |
| R6058053 | 1 | 0.05275143  | 0.06989437  | 0.6472007  | 0.052847505 | 0.071693145 | 0.03362422  | 0.07198861  |
| R6080600 | 5 | 0.1124182   | 0.12217916  | 0.3107349  | 0.11147666  | 0.12447465  | 0.09249344  | 0.126223    |
| R6084846 | 3 | 0.086993605 | 0.10171819  | 0.45271257 | 0.08586692  | 0.103563145 | 0.0640672   | 0.10507835  |
| R6086139 | 1 | 0.046441432 | 0.0601953   | 0.69316787 | 0.045922823 | 0.06260191  | 0.028605033 | 0.063065566 |
| R6103640 | 4 | 0.089657746 | 0.105769046 | 0.43309462 | 0.08892123  | 0.1070392   | 0.06696405  | 0.10855414  |
| R6108690 | 3 | 0.063756146 | 0.0774594   | 0.5923887  | 0.06271124  | 0.080176726 | 0.042508397 | 0.08099946  |
| R6114572 | 4 | 0.06360747  | 0.07948278  | 0.5866303  | 0.0632751   | 0.082049765 | 0.042436555 | 0.08251806  |

|          |   |             |             |            |             |             |             |             |
|----------|---|-------------|-------------|------------|-------------|-------------|-------------|-------------|
| R6132310 | 4 | 0.10701882  | 0.11730581  | 0.34127718 | 0.10617183  | 0.12043688  | 0.085936956 | 0.12185255  |
| R6152556 | 4 | 0.102258004 | 0.11481173  | 0.36513373 | 0.10148363  | 0.11715322  | 0.08051268  | 0.118647024 |
| R6155093 | 4 | 0.05447695  | 0.070037656 | 0.6417148  | 0.054091092 | 0.072074786 | 0.034962658 | 0.072642    |
| R6157726 | 4 | 0.07491649  | 0.087100565 | 0.53128505 | 0.07321422  | 0.08990972  | 0.05238477  | 0.09118922  |
| R6163933 | 5 | 0.09897297  | 0.111880586 | 0.3836272  | 0.09823884  | 0.11458196  | 0.07683329  | 0.11586517  |
| R6171213 | 3 | 0.07017209  | 0.08398535  | 0.5542526  | 0.0690768   | 0.08681615  | 0.048041645 | 0.087655365 |
| R6176158 | 3 | 0.07398761  | 0.091124624 | 0.5222861  | 0.07377602  | 0.093169324 | 0.051702667 | 0.09395363  |
| R6216782 | 4 | 0.08916283  | 0.105395816 | 0.43544164 | 0.08853423  | 0.10680598  | 0.06645704  | 0.108202495 |
| R6226355 | 5 | 0.054177884 | 0.06878323  | 0.6453823  | 0.05374197  | 0.07144262  | 0.034614068 | 0.071858004 |
| R6231758 | 3 | 0.12557133  | 0.104302436 | 0.35744137 | 0.10870384  | 0.09210676  | 0.103562206 | 0.10831207  |
| R6249698 | 5 | 0.07615387  | 0.09188309  | 0.5133258  | 0.07556939  | 0.094245076 | 0.05364747  | 0.09517525  |
| R6253512 | 5 | 0.070124164 | 0.0850933   | 0.55075556 | 0.06947846  | 0.08792172  | 0.048037294 | 0.08858957  |
| R6263745 | 5 | 0.11258929  | 0.12117276  | 0.3127825  | 0.111333504 | 0.12381795  | 0.092726834 | 0.1255771   |
| R6265038 | 5 | 0.06356052  | 0.07805718  | 0.59130776 | 0.062732846 | 0.08064079  | 0.042365268 | 0.081335634 |
| R6268135 | 3 | 0.023586312 | 0.03397723  | 0.83392614 | 0.023618776 | 0.036158934 | 0.012605287 | 0.036127333 |
| R6280004 | 4 | 0.095754474 | 0.10808241  | 0.4050631  | 0.094634034 | 0.110817954 | 0.07326961  | 0.11237839  |
| R6283436 | 4 | 0.10906466  | 0.119040444 | 0.33048883 | 0.10800634  | 0.12172636  | 0.08836048  | 0.1233129   |
| R6284240 | 3 | 0.06975806  | 0.08535301  | 0.55175555 | 0.06911624  | 0.08771401  | 0.047791846 | 0.08851134  |
| R6292415 | 3 | 0.11883608  | 0.12578717  | 0.27776685 | 0.11787361  | 0.12837036  | 0.10100526  | 0.1303606   |
| R6312023 | 4 | 0.07387408  | 0.088830754 | 0.52910596 | 0.07306183  | 0.0913412   | 0.051506177 | 0.09227993  |
| R6319811 | 4 | 0.08180551  | 0.09545905  | 0.4856814  | 0.080622375 | 0.098144665 | 0.058926683 | 0.09936033  |
| R6337324 | 3 | 0.12631786  | 0.13548563  | 0.22444625 | 0.1277502   | 0.13612658  | 0.11198798  | 0.13788553  |
| R6346298 | 1 | 0.08223951  | 0.09499431  | 0.48556218 | 0.080836885 | 0.0979039   | 0.059322763 | 0.099140495 |
| R6352950 | 5 | 0.093623    | 0.106513105 | 0.4160179  | 0.09269705  | 0.109435484 | 0.07094865  | 0.110764734 |
| R6382654 | 4 | 0.063956164 | 0.07901316  | 0.58744466 | 0.06326901  | 0.081451185 | 0.04275159  | 0.08211427  |
| R6392007 | 3 | 0.07431914  | 0.08984233  | 0.5243535  | 0.07380394  | 0.09252374  | 0.05189031  | 0.09326707  |
| R6411801 | 5 | 0.07801336  | 0.09169875  | 0.5075179  | 0.077016294 | 0.094848536 | 0.055198036 | 0.09570716  |
| R6415047 | 4 | 0.07563218  | 0.08983913  | 0.52015746 | 0.07478461  | 0.09286408  | 0.05301999  | 0.093702614 |
| R6429301 | 5 | 0.0859468   | 0.10133775  | 0.45657215 | 0.08514267  | 0.10327731  | 0.0631498   | 0.10457354  |
| R6476704 | 2 | 0.07962772  | 0.096528426 | 0.48917764 | 0.07943496  | 0.09868042  | 0.057008117 | 0.09954278  |
| R6478102 | 5 | 0.07877474  | 0.091884434 | 0.50499356 | 0.07751958  | 0.09490653  | 0.055953667 | 0.09596749  |
| R6487961 | 5 | 0.09305725  | 0.10673667  | 0.41703635 | 0.09239421  | 0.109585404 | 0.070406325 | 0.1107838   |
| R6531744 | 2 | 0.0815569   | 0.10117564  | 0.47169268 | 0.08176372  | 0.101859726 | 0.058906633 | 0.10304465  |
| R6536134 | 5 | 0.05228566  | 0.06745066  | 0.6552366  | 0.051954783 | 0.06975868  | 0.03313555  | 0.07017798  |
| R6557859 | 3 | 0.051461436 | 0.066640526 | 0.66001624 | 0.051150184 | 0.0689094   | 0.032502834 | 0.06931934  |
| R6587113 | 2 | 0.038769804 | 0.051878355 | 0.73890376 | 0.038546093 | 0.054320138 | 0.02297944  | 0.054602437 |
| R6600608 | 4 | 0.061208118 | 0.07652848  | 0.6033993  | 0.060503088 | 0.0786098   | 0.040425196 | 0.07932601  |
| R6604064 | 4 | 0.057640728 | 0.07351424  | 0.62197185 | 0.05736202  | 0.07581693  | 0.037469123 | 0.07622508  |
| R6604404 | 3 | 0.08022089  | 0.09411794  | 0.49491265 | 0.07896889  | 0.09656446  | 0.057433743 | 0.09778148  |
| R6622577 | 4 | 0.09448687  | 0.10800728  | 0.4097046  | 0.093585595 | 0.11049504  | 0.07186101  | 0.11185962  |
| R6627307 | 5 | 0.07899098  | 0.095371656 | 0.49484754 | 0.078535326 | 0.09745122  | 0.05635911  | 0.09844419  |
| R6636386 | 5 | 0.03227879  | 0.044643026 | 0.77869195 | 0.032152686 | 0.04684067  | 0.01839404  | 0.04699891  |
| R6665276 | 0 | 0.106300145 | 0.11859357  | 0.34098232 | 0.105773404 | 0.12079508  | 0.08518644  | 0.12236902  |
| R6679530 | 3 | 0.09351665  | 0.10725033  | 0.41502035 | 0.09262178  | 0.109679386 | 0.07087895  | 0.111032546 |
| R6681721 | 4 | 0.08181828  | 0.09745981  | 0.4815013  | 0.080777854 | 0.09891821  | 0.059100073 | 0.1004244   |

|          |   |             |             |            |             |             |             |             |
|----------|---|-------------|-------------|------------|-------------|-------------|-------------|-------------|
| R6681836 | 2 | 0.06520981  | 0.07954894  | 0.5809098  | 0.06461238  | 0.082801975 | 0.04369429  | 0.08322282  |
| R6698302 | 2 | 0.09225049  | 0.10673295  | 0.4201514  | 0.09164519  | 0.10921609  | 0.06957546  | 0.11042839  |
| R6728038 | 3 | 0.08506256  | 0.096386336 | 0.47276586 | 0.08330828  | 0.09953138  | 0.062014066 | 0.10093157  |
| R6733106 | 6 | 0.014451695 | 0.021670131 | 0.8958926  | 0.014373014 | 0.023140509 | 0.007068879 | 0.023403246 |
| R6739300 | 5 | 0.06154393  | 0.07755311  | 0.5989178  | 0.06115666  | 0.07978891  | 0.04070895  | 0.08033065  |
| R6743664 | 1 | 0.08579631  | 0.10079064  | 0.45751107 | 0.08518316  | 0.1033557   | 0.062913835 | 0.10444934  |
| R6751504 | 4 | 0.099238776 | 0.10769106  | 0.39478707 | 0.09714137  | 0.11107009  | 0.07699642  | 0.11307518  |
| R6759986 | 4 | 0.0953987   | 0.10955795  | 0.402232   | 0.09477107  | 0.1119469   | 0.07292374  | 0.11316965  |
| R6761402 | 1 | 0.06098711  | 0.07406229  | 0.6107609  | 0.05971913  | 0.07675026  | 0.04008458  | 0.07763565  |
| R6765868 | 3 | 0.10146842  | 0.112649135 | 0.37375388 | 0.100243695 | 0.11539272  | 0.07952007  | 0.11697202  |
| R6776130 | 3 | 0.089417644 | 0.102298416 | 0.44274378 | 0.087993264 | 0.10477632  | 0.06646091  | 0.10630966  |
| R6796261 | 5 | 0.04558717  | 0.05952729  | 0.69769925 | 0.045121916 | 0.061833803 | 0.02797337  | 0.062257245 |
| R6799253 | 3 | 0.11267656  | 0.12453412  | 0.30166003 | 0.11310214  | 0.1269195   | 0.09282002  | 0.12828763  |
| R6802400 | 3 | 0.060176454 | 0.075475775 | 0.60875857 | 0.059674516 | 0.07794653  | 0.03952506  | 0.07844305  |
| R6820248 | 4 | 0.09030721  | 0.10476117  | 0.4321412  | 0.08957391  | 0.107236885 | 0.06750654  | 0.10847307  |
| R6828280 | 5 | 0.033923525 | 0.04688333  | 0.7675696  | 0.03384771  | 0.049005307 | 0.019575557 | 0.049194973 |
| R6847727 | 3 | 0.072532736 | 0.087245375 | 0.5370761  | 0.071846165 | 0.09023288  | 0.05015617  | 0.09091048  |
| R6849345 | 4 | 0.094968945 | 0.10643917  | 0.4119884  | 0.09367793  | 0.10951376  | 0.07234903  | 0.111062735 |
| R6862468 | 5 | 0.09213675  | 0.10462408  | 0.4263567  | 0.09098711  | 0.107553504 | 0.06935327  | 0.10898859  |
| R6879714 | 3 | 0.07403456  | 0.0908604   | 0.52251244 | 0.073840655 | 0.09314991  | 0.051738832 | 0.09386321  |
| R6887989 | 3 | 0.11187029  | 0.124081016 | 0.30654797 | 0.11201558  | 0.12595527  | 0.09191184  | 0.12761806  |
| R6911631 | 4 | 0.085783795 | 0.09709073  | 0.46810782 | 0.084126845 | 0.10034718  | 0.06278346  | 0.10176022  |
| R6913259 | 5 | 0.055212848 | 0.0715893   | 0.6340529  | 0.05530746  | 0.07412954  | 0.03548643  | 0.0742216   |
| R6928327 | 5 | 0.053634055 | 0.068446726 | 0.6485233  | 0.053121634 | 0.07076053  | 0.03424263  | 0.07127119  |
| R6934314 | 2 | 0.09201577  | 0.102769256 | 0.43251762 | 0.0902384   | 0.10583376  | 0.06915787  | 0.1074673   |
| R6939144 | 4 | 0.051693603 | 0.06702737  | 0.6580118  | 0.051474396 | 0.0694325   | 0.032652106 | 0.06970819  |
| R6939699 | 2 | 0.066372864 | 0.08283965  | 0.5693961  | 0.06597698  | 0.084947705 | 0.044869892 | 0.08559685  |
| R6998518 | 4 | 0.11414397  | 0.12469801  | 0.2982468  | 0.11353159  | 0.12641491  | 0.09466677  | 0.12829798  |
| R7015250 | 3 | 0.07688897  | 0.09274382  | 0.5084735  | 0.07637568  | 0.09515248  | 0.05434856  | 0.09601695  |
| R7025378 | 4 | 0.05099796  | 0.06508401  | 0.66543925 | 0.050486345 | 0.06776191  | 0.03206817  | 0.06816242  |
| R7029629 | 2 | 0.103670366 | 0.12024727  | 0.34690326 | 0.10397605  | 0.12066851  | 0.082052015 | 0.12248253  |
| R7039412 | 0 | 0.10532369  | 0.120231144 | 0.33971915 | 0.10567435  | 0.12178861  | 0.08396429  | 0.12329876  |
| R7043881 | 4 | 0.06515409  | 0.080201015 | 0.5797761  | 0.06460623  | 0.083049946 | 0.043666717 | 0.08354595  |
| R7054373 | 3 | 0.053708903 | 0.06953016  | 0.6450395  | 0.05352434  | 0.07179382  | 0.034297403 | 0.07210578  |
| R7063792 | 0 | 0.08798137  | 0.10403026  | 0.4423628  | 0.08745565  | 0.10584797  | 0.065231405 | 0.107090555 |
| R7066784 | 6 | 0.052499108 | 0.06732747  | 0.6544958  | 0.052179135 | 0.069965236 | 0.03325736  | 0.07027594  |
| R7070153 | 5 | 0.03968428  | 0.05307743  | 0.7332619  | 0.039371926 | 0.055291142 | 0.023664633 | 0.055648737 |
| R7090624 | 4 | 0.067620225 | 0.081953146 | 0.5681258  | 0.06661562  | 0.084444    | 0.045908187 | 0.085332975 |
| R7095349 | 4 | 0.077648774 | 0.08640524  | 0.5237646  | 0.07502224  | 0.08981937  | 0.055006012 | 0.0923337   |
| R7096488 | 4 | 0.036860097 | 0.05059728  | 0.7488187  | 0.036732994 | 0.052558847 | 0.0216199   | 0.052812167 |
| R7129766 | 3 | 0.037356284 | 0.049148448 | 0.7513227  | 0.036743302 | 0.05145439  | 0.02195117  | 0.052023686 |
| R7134834 | 5 | 0.05334858  | 0.067780755 | 0.6512515  | 0.052742474 | 0.07020137  | 0.03394036  | 0.070735    |
| R7137826 | 4 | 0.06978781  | 0.0860261   | 0.54964197 | 0.06936308  | 0.0883492   | 0.047815662 | 0.08901614  |
| R7141740 | 4 | 0.042579588 | 0.055824365 | 0.7169177  | 0.042096984 | 0.058219023 | 0.025713267 | 0.058649123 |
| R7143693 | 3 | 0.073474005 | 0.08862153  | 0.53119314 | 0.07264247  | 0.09096886  | 0.051127717 | 0.09197227  |

|          |   |             |             |            |             |             |             |             |
|----------|---|-------------|-------------|------------|-------------|-------------|-------------|-------------|
| R7157957 | 4 | 0.08508575  | 0.09965849  | 0.46285868 | 0.08436893  | 0.10239117  | 0.06216697  | 0.10346999  |
| R7202764 | 5 | 0.025935667 | 0.03730123  | 0.81814927 | 0.025933705 | 0.03919293  | 0.014176299 | 0.039310947 |
| R7208968 | 5 | 0.07828838  | 0.09320932  | 0.50270057 | 0.07754004  | 0.09587822  | 0.055577375 | 0.09680617  |
| R7210264 | 4 | 0.030825233 | 0.04101287  | 0.79295814 | 0.030320184 | 0.043494426 | 0.017387543 | 0.044001635 |
| R7210604 | 3 | 0.065508954 | 0.08119492  | 0.57619685 | 0.0650456   | 0.08372756  | 0.044030007 | 0.084296145 |
| R7255476 | 3 | 0.060438983 | 0.07208319  | 0.6175493  | 0.058829024 | 0.07511781  | 0.039695043 | 0.07628665  |
| R7269950 | 3 | 0.1104818   | 0.1273741   | 0.30494916 | 0.11151959  | 0.12647296  | 0.09040239  | 0.12879999  |
| R7272395 | 1 | 0.10771852  | 0.1192873   | 0.33407328 | 0.10712927  | 0.121687315 | 0.08686456  | 0.12323979  |
| R7286984 | 2 | 0.093724094 | 0.1058107   | 0.4186716  | 0.09228982  | 0.10839744  | 0.07102965  | 0.11007662  |
| R7287798 | 5 | 0.10652429  | 0.12004596  | 0.33688486 | 0.1062453   | 0.12165053  | 0.08541462  | 0.12323444  |
| R7288382 | 4 | 0.09647554  | 0.11037121  | 0.39698616 | 0.09566961  | 0.11253143  | 0.07403243  | 0.113933586 |
| R7289081 | 4 | 0.104117826 | 0.11267271  | 0.3650387  | 0.102258384 | 0.11569717  | 0.08257046  | 0.11764477  |
| R7295303 | 4 | 0.057882912 | 0.072757035 | 0.62339735 | 0.05731379  | 0.07531392  | 0.037558474 | 0.075776555 |
| R7325259 | 3 | 0.06341582  | 0.079264425 | 0.5884817  | 0.062899195 | 0.081494555 | 0.04229413  | 0.08215022  |
| R7334123 | 2 | 0.047303915 | 0.06221163  | 0.6845873  | 0.047149576 | 0.064617775 | 0.029267142 | 0.06486265  |
| R7347788 | 1 | 0.051573057 | 0.06662027  | 0.65961915 | 0.05125032  | 0.06901709  | 0.032560878 | 0.06935927  |
| R7366225 | 4 | 0.067696065 | 0.083531186 | 0.56350493 | 0.06707246  | 0.085709676 | 0.04597361  | 0.08651201  |
| R7369657 | 3 | 0.03530881  | 0.048382003 | 0.7586983  | 0.03531706  | 0.050911177 | 0.020467503 | 0.050915156 |
| R7384738 | 5 | 0.10997041  | 0.118018284 | 0.32918465 | 0.108741626 | 0.1214409   | 0.08954056  | 0.12310353  |
| R7391979 | 3 | 0.107418574 | 0.120275095 | 0.33311316 | 0.10702269  | 0.12208647  | 0.086392134 | 0.12369191  |
| R7412731 | 5 | 0.047675185 | 0.0629711   | 0.68156224 | 0.047552947 | 0.065204166 | 0.029582426 | 0.06545192  |
| R7423003 | 2 | 0.075012095 | 0.090357244 | 0.5217751  | 0.074168034 | 0.092561126 | 0.052516878 | 0.09360951  |
| R7438391 | 5 | 0.056966368 | 0.07400057  | 0.62259275 | 0.05701505  | 0.07610835  | 0.03695246  | 0.07636449  |
| R7446231 | 4 | 0.079539716 | 0.08707707  | 0.5164544  | 0.07632762  | 0.090088956 | 0.056967154 | 0.09354506  |
| R7462671 | 4 | 0.088727705 | 0.10195638  | 0.4446841  | 0.08773359  | 0.10492666  | 0.06578618  | 0.1061854   |
| R7483736 | 3 | 0.1069657   | 0.11434567  | 0.349598   | 0.10527534  | 0.11796438  | 0.085944645 | 0.11990628  |
| R7497765 | 5 | 0.04281375  | 0.055548925 | 0.717424   | 0.04208989  | 0.057788026 | 0.0259147   | 0.058420777 |
| R7506996 | 4 | 0.08069603  | 0.09324488  | 0.4951273  | 0.07929816  | 0.09631784  | 0.057847284 | 0.0974685   |
| R7516349 | 4 | 0.070387766 | 0.08422606  | 0.55284977 | 0.06931282  | 0.087059155 | 0.04825566  | 0.08790879  |
| R7518527 | 4 | 0.083038025 | 0.09470919  | 0.48422223 | 0.08126462  | 0.09762093  | 0.060078315 | 0.099066585 |
| R7539797 | 6 | 0.03262026  | 0.045605354 | 0.7747614  | 0.032682613 | 0.047816657 | 0.018653773 | 0.047859903 |
| R7540069 | 5 | 0.085918576 | 0.101636484 | 0.45496517 | 0.085457884 | 0.10394462  | 0.06307829  | 0.10499893  |
| R7551006 | 3 | 0.09867225  | 0.114096284 | 0.37775296 | 0.09899973  | 0.11648441  | 0.07648871  | 0.11750571  |
| R7594705 | 5 | 0.05251118  | 0.06867337  | 0.6509153  | 0.0524892   | 0.070895195 | 0.033385895 | 0.07112989  |
| R7599755 | 2 | 0.08919553  | 0.10157573  | 0.44469938 | 0.08784223  | 0.104469866 | 0.06629032  | 0.105926864 |
| R7604075 | 4 | 0.057990693 | 0.07358193  | 0.6202472  | 0.05774574  | 0.07621126  | 0.037725482 | 0.07649773  |
| R7627203 | 3 | 0.05766892  | 0.0717466   | 0.6263842  | 0.05700831  | 0.07468308  | 0.037375215 | 0.07513366  |
| R7641350 | 4 | 0.07619453  | 0.09129684  | 0.5148247  | 0.07544776  | 0.09379317  | 0.0536619   | 0.09478109  |
| R7645936 | 4 | 0.0982259   | 0.11156756  | 0.38813037 | 0.097262025 | 0.113715485 | 0.07591808  | 0.115180604 |
| R7650779 | 3 | 0.096372105 | 0.11013129  | 0.39863953 | 0.09531626  | 0.11199905  | 0.073966086 | 0.11357567  |
| R7651923 | 4 | 0.043200772 | 0.057110045 | 0.7114648  | 0.042871665 | 0.059346378 | 0.026263079 | 0.0597432   |
| R7664813 | 3 | 0.047395762 | 0.06153662  | 0.6859913  | 0.047076106 | 0.06420268  | 0.029328031 | 0.064469576 |
| R7696135 | 4 | 0.08896706  | 0.10558486  | 0.43432704 | 0.0888148   | 0.10745985  | 0.06625285  | 0.10859361  |
| R7698313 | 1 | 0.087306425 | 0.102632664 | 0.44724888 | 0.08690369  | 0.10524056  | 0.06445463  | 0.10621319  |
| R7702934 | 5 | 0.07394563  | 0.08850137  | 0.5294976  | 0.073107645 | 0.09138694  | 0.0514283   | 0.09213248  |

|          |   |             |             |            |             |             |             |             |
|----------|---|-------------|-------------|------------|-------------|-------------|-------------|-------------|
| R7726976 | 3 | 0.028219717 | 0.040108886 | 0.80357224 | 0.028181473 | 0.04205467  | 0.01567345  | 0.042189635 |
| R7736989 | 4 | 0.056962676 | 0.07283331  | 0.625263   | 0.056873485 | 0.07546817  | 0.03691874  | 0.07568055  |
| R7737688 | 6 | 0.05891393  | 0.073281646 | 0.61895496 | 0.05814625  | 0.075818986 | 0.0384394   | 0.07644478  |
| R7738727 | 3 | 0.048750337 | 0.061125245 | 0.6834476  | 0.04782013  | 0.06393767  | 0.030291006 | 0.064627945 |
| R7746772 | 4 | 0.04489173  | 0.05785547  | 0.7043823  | 0.04421976  | 0.060359888 | 0.027425352 | 0.060865503 |
| R7758743 | 4 | 0.07124525  | 0.08557302  | 0.5463658  | 0.070305705 | 0.088305734 | 0.049049266 | 0.08915517  |
| R7767837 | 4 | 0.05165586  | 0.065640405 | 0.6618691  | 0.05110161  | 0.06834782  | 0.032584477 | 0.06880071  |
| R7791442 | 4 | 0.050658297 | 0.065082885 | 0.6667167  | 0.05019252  | 0.06752783  | 0.031846162 | 0.067975625 |
| R7796947 | 3 | 0.075684346 | 0.09131941  | 0.5164204  | 0.07506261  | 0.093699805 | 0.053176384 | 0.094637014 |
| R7821738 | 4 | 0.046966627 | 0.06094234  | 0.689417   | 0.046507943 | 0.063386835 | 0.029000789 | 0.06377848  |
| R7840275 | 4 | 0.0822858   | 0.09596463  | 0.48245382 | 0.08119889  | 0.09873696  | 0.059433777 | 0.09992609  |
| R7844746 | 5 | 0.10891077  | 0.11804253  | 0.33417848 | 0.10746267  | 0.12065346  | 0.08829254  | 0.122459546 |
| R7851092 | 5 | 0.08244126  | 0.096165776 | 0.48087066 | 0.08151449  | 0.099262126 | 0.05949549  | 0.1002502   |
| R7876628 | 5 | 0.070171945 | 0.08711047  | 0.5452133  | 0.06998851  | 0.08932282  | 0.04823056  | 0.08996233  |
| R7881801 | 4 | 0.104399756 | 0.11787208  | 0.34914103 | 0.10419716  | 0.120059654 | 0.08291735  | 0.12141297  |
| R7903817 | 4 | 0.08037774  | 0.09518351  | 0.48988262 | 0.07981331  | 0.0981945   | 0.05753628  | 0.09901204  |
| R7904841 | 1 | 0.073779576 | 0.090450555 | 0.52454555 | 0.073517755 | 0.09275913  | 0.05148151  | 0.093465865 |
| R7911202 | 3 | 0.0397797   | 0.053447932 | 0.73187023 | 0.039560672 | 0.055671033 | 0.023709068 | 0.055961408 |
| R7912121 | 4 | 0.043929156 | 0.05787671  | 0.7066675  | 0.043695156 | 0.060436636 | 0.026723113 | 0.060671728 |
| R7915228 | 3 | 0.05972714  | 0.07638231  | 0.6075401  | 0.059608977 | 0.07859479  | 0.03918662  | 0.07896012  |
| R7920516 | 4 | 0.079486474 | 0.09297163  | 0.49913895 | 0.07849145  | 0.09614037  | 0.056679104 | 0.09709202  |
| R7944883 | 5 | 0.056567654 | 0.07109473  | 0.6315454  | 0.056069445 | 0.073881626 | 0.036536712 | 0.07430442  |
| R7950545 | 4 | 0.06623315  | 0.080914415 | 0.5752694  | 0.0653482   | 0.083312035 | 0.044750344 | 0.0841724   |
| R7959406 | 5 | 0.08273843  | 0.09683598  | 0.47838777 | 0.0818218   | 0.099592395 | 0.059868615 | 0.100755095 |
| R7978618 | 4 | 0.041792486 | 0.05674148  | 0.7163734  | 0.041883435 | 0.058989033 | 0.025172073 | 0.059048034 |
| R7987257 | 5 | 0.037982482 | 0.05159978  | 0.74236745 | 0.03784911  | 0.053788524 | 0.022424702 | 0.053987935 |
| R7993799 | 6 | 0.08176189  | 0.09718578  | 0.48092812 | 0.08107799  | 0.09949962  | 0.058958624 | 0.100587994 |
| R7995082 | 4 | 0.080271915 | 0.09427033  | 0.4930973  | 0.079395324 | 0.097267725 | 0.057432212 | 0.09826519  |
| R8003745 | 4 | 0.08348479  | 0.09890285  | 0.4712716  | 0.08264685  | 0.10083775  | 0.060687263 | 0.10216894  |
| R8044591 | 2 | 0.09099249  | 0.10829504  | 0.4203987  | 0.0911023   | 0.10991248  | 0.06825908  | 0.111039944 |
| R8046664 | 5 | 0.074704446 | 0.08660566  | 0.5331906  | 0.07292789  | 0.089541204 | 0.05219241  | 0.09083781  |
| R8054504 | 3 | 0.065423355 | 0.082059264 | 0.57400185 | 0.06522763  | 0.08436459  | 0.044405843 | 0.08487744  |
| R8059994 | 3 | 0.11039737  | 0.12306005  | 0.31468093 | 0.11044538  | 0.12492407  | 0.08998183  | 0.12651035  |
| R8062004 | 3 | 0.097814456 | 0.10675617  | 0.4016998  | 0.095944084 | 0.1103301   | 0.07545398  | 0.11200134  |
| R8072902 | 5 | 0.07115272  | 0.08653149  | 0.54409826 | 0.070456095 | 0.088952154 | 0.04902038  | 0.08978895  |
| R8075334 | 4 | 0.059912816 | 0.07518785  | 0.61043066 | 0.059396025 | 0.07756425  | 0.039350174 | 0.078158155 |
| R8093392 | 1 | 0.024991864 | 0.03501161  | 0.8271385  | 0.02480206  | 0.037163526 | 0.01352645  | 0.03736606  |
| R8125311 | 3 | 0.04443556  | 0.05815432  | 0.7044122  | 0.04410028  | 0.060755145 | 0.027094388 | 0.061048027 |
| R8130934 | 2 | 0.10550079  | 0.12077627  | 0.33899507 | 0.10557397  | 0.121578604 | 0.08417506  | 0.123400256 |
| R8155560 | 3 | 0.060799897 | 0.07491008  | 0.6087245  | 0.059882574 | 0.07751175  | 0.039974928 | 0.078196235 |
| R8180874 | 4 | 0.075792685 | 0.09151691  | 0.51582754 | 0.07511375  | 0.093726374 | 0.053294368 | 0.0947284   |
| R8186418 | 1 | 0.06266441  | 0.077052884 | 0.5964589  | 0.061925992 | 0.079801165 | 0.041626725 | 0.08046988  |
| R8209563 | 5 | 0.05712088  | 0.0726447   | 0.62596333 | 0.056768253 | 0.075034894 | 0.037027065 | 0.07544085  |
| R8223945 | 4 | 0.06014498  | 0.07525204  | 0.6089331  | 0.05973076  | 0.078007065 | 0.039495025 | 0.07843701  |
| R8288288 | 4 | 0.08101474  | 0.095459975 | 0.48891467 | 0.07984623  | 0.097595535 | 0.05822919  | 0.09893972  |

|          |   |             |             |            |             |             |             |             |
|----------|---|-------------|-------------|------------|-------------|-------------|-------------|-------------|
| R8292982 | 5 | 0.10248025  | 0.117069386 | 0.35863903 | 0.10225443  | 0.11869751  | 0.08066822  | 0.12019119  |
| R8293796 | 4 | 0.039482873 | 0.053945914 | 0.73096305 | 0.039578944 | 0.056285266 | 0.023454081 | 0.056289885 |
| R8316516 | 3 | 0.08375249  | 0.098163046 | 0.47207636 | 0.08274937  | 0.10055741  | 0.060858004 | 0.101843245 |
| R8317760 | 4 | 0.07172248  | 0.0859397   | 0.54322857 | 0.07091232  | 0.08894904  | 0.049512748 | 0.089735165 |
| R8328927 | 4 | 0.09917102  | 0.112870775 | 0.38126203 | 0.09841808  | 0.11494546  | 0.07695501  | 0.116377674 |
| R8329066 | 4 | 0.11114159  | 0.121955805 | 0.31347755 | 0.11114186  | 0.12512398  | 0.09089371  | 0.12626553  |
| R8330118 | 3 | 0.10624051  | 0.11992726  | 0.3366789  | 0.1064691   | 0.12213779  | 0.085063174 | 0.12348328  |
| R8351613 | 3 | 0.08050298  | 0.09280026  | 0.49715814 | 0.07898693  | 0.095812514 | 0.05762628  | 0.09711293  |
| R8375980 | 4 | 0.06986496  | 0.085497655 | 0.5508117  | 0.06929848  | 0.08797871  | 0.047841646 | 0.08870683  |
| R8399817 | 3 | 0.07529253  | 0.08899599  | 0.5246937  | 0.07401189  | 0.091527276 | 0.05281065  | 0.09266792  |
| R8410459 | 4 | 0.09318748  | 0.10674874  | 0.41664594 | 0.092482544 | 0.10965084  | 0.07045852  | 0.11082589  |
| R8410904 | 3 | 0.07120857  | 0.08656104  | 0.5437332  | 0.070538454 | 0.08906555  | 0.049048413 | 0.08984482  |
| R8415954 | 5 | 0.055798482 | 0.06970738  | 0.63852197 | 0.05496071  | 0.07222012  | 0.03589586  | 0.07289555  |
| R8423894 | 4 | 0.057096355 | 0.07115772  | 0.63117296 | 0.056092262 | 0.07332184  | 0.03697886  | 0.07417995  |
| R8428404 | 4 | 0.08630322  | 0.10035138  | 0.4583453  | 0.085089624 | 0.102467895 | 0.0634624   | 0.103980206 |
| R8432213 | 5 | 0.09383281  | 0.106157325 | 0.41675085 | 0.092639804 | 0.1089506   | 0.07115878  | 0.11050977  |
| R8434166 | 3 | 0.10072978  | 0.11383127  | 0.37389615 | 0.099731036 | 0.11566679  | 0.078827806 | 0.11731716  |
| R8436904 | 5 | 0.09352387  | 0.105255604 | 0.4199773  | 0.0922612   | 0.108400844 | 0.07080434  | 0.10977684  |
| R8444624 | 2 | 0.059782274 | 0.07679027  | 0.606009   | 0.05981218  | 0.07899833  | 0.039277762 | 0.07933017  |
| R8451530 | 4 | 0.08490461  | 0.098688036 | 0.46657854 | 0.08385216  | 0.10130791  | 0.062024105 | 0.10264467  |
| R8457289 | 4 | 0.040678438 | 0.055521764 | 0.7230054  | 0.040812522 | 0.05780824  | 0.024355346 | 0.05781829  |
| R8466373 | 3 | 0.09435772  | 0.10806011  | 0.40995592 | 0.09350529  | 0.11047514  | 0.071784295 | 0.11186158  |
| R8472815 | 5 | 0.09363952  | 0.10669804  | 0.41735515 | 0.09222395  | 0.10871913  | 0.07090652  | 0.11045767  |
| R8477425 | 4 | 0.10671546  | 0.11642559  | 0.34480304 | 0.10566165  | 0.11969644  | 0.08555741  | 0.1211404   |
| R8492506 | 4 | 0.1041919   | 0.1171407   | 0.3528409  | 0.103496015 | 0.119037606 | 0.08266389  | 0.12062897  |
| R8542703 | 4 | 0.08692356  | 0.10111293  | 0.45417482 | 0.08577924  | 0.10326426  | 0.063992575 | 0.10475256  |
| R8553415 | 1 | 0.07723303  | 0.089683406 | 0.51611745 | 0.07576554  | 0.09276659  | 0.054532353 | 0.09390169  |
| R8553520 | 4 | 0.07629213  | 0.091356896 | 0.5150525  | 0.07533683  | 0.093514994 | 0.0537605   | 0.0946861   |
| R8572172 | 2 | 0.11730222  | 0.12243951  | 0.29139426 | 0.11588455  | 0.12621534  | 0.098799266 | 0.12796493  |
| R8573871 | 5 | 0.048331693 | 0.06280965  | 0.67997974 | 0.04798929  | 0.06522597  | 0.030056823 | 0.065606795 |
| R8596114 | 4 | 0.09780213  | 0.106580384 | 0.40278676 | 0.09566461  | 0.10985045  | 0.07546323  | 0.111852385 |
| R8598847 | 2 | 0.093271375 | 0.10441502  | 0.42424145 | 0.09153867  | 0.10711859  | 0.07046981  | 0.10894503  |
| R8608442 | 3 | 0.085980654 | 0.100709654 | 0.45721847 | 0.0852675   | 0.10324851  | 0.063110515 | 0.10446472  |
| R8615683 | 4 | 0.052497324 | 0.066688575 | 0.6567614  | 0.051878646 | 0.06921138  | 0.033238836 | 0.069723874 |
| R8626395 | 4 | 0.08043877  | 0.09668586  | 0.48634598 | 0.08002091  | 0.09890806  | 0.0577258   | 0.09987467  |
| R8629052 | 5 | 0.05900705  | 0.0732063   | 0.6189861  | 0.058155227 | 0.075774    | 0.03845937  | 0.07641184  |
| R8635714 | 4 | 0.05811185  | 0.07430721  | 0.61827457 | 0.05791408  | 0.076557    | 0.037873365 | 0.07696194  |
| R8636748 | 5 | 0.06639097  | 0.08017131  | 0.5772423  | 0.06517581  | 0.08266427  | 0.044756398 | 0.08359897  |
| R8647890 | 4 | 0.07956452  | 0.09415931  | 0.49663964 | 0.07856716  | 0.096525334 | 0.056825306 | 0.09771873  |
| R8678748 | 3 | 0.041674264 | 0.056005437 | 0.71837837 | 0.041715186 | 0.058547262 | 0.025072875 | 0.058606558 |
| R8680264 | 5 | 0.036794826 | 0.048823595 | 0.7539797  | 0.03624627  | 0.05103144  | 0.021568771 | 0.05155547  |
| R8704458 | 3 | 0.12053037  | 0.13176107  | 0.25638056 | 0.121223696 | 0.13224429  | 0.103538156 | 0.13432185  |
| R8718712 | 5 | 0.09465539  | 0.108948305 | 0.4070932  | 0.09382763  | 0.110989325 | 0.07213572  | 0.11235039  |
| R8724814 | 4 | 0.080278076 | 0.095324725 | 0.49074808 | 0.07950008  | 0.09775006  | 0.057542607 | 0.09885645  |
| R8725848 | 3 | 0.11683667  | 0.12222307  | 0.29501817 | 0.114983924 | 0.1252633   | 0.098226905 | 0.12744793  |

|          |   |             |             |            |             |             |             |             |
|----------|---|-------------|-------------|------------|-------------|-------------|-------------|-------------|
| R8733348 | 4 | 0.056858115 | 0.068932205 | 0.63735723 | 0.055484463 | 0.07183003  | 0.03671695  | 0.07282104  |
| R8741068 | 1 | 0.082803175 | 0.09662679  | 0.47856855 | 0.081855096 | 0.099623814 | 0.059842426 | 0.10068021  |
| R8744945 | 3 | 0.106028    | 0.11573408  | 0.34955102 | 0.10477012  | 0.11871633  | 0.084828585 | 0.12037191  |
| R8756461 | 3 | 0.07971813  | 0.09661364  | 0.48967633 | 0.0792352   | 0.09827828  | 0.05708965  | 0.0993888   |
| R8759568 | 1 | 0.08065553  | 0.0930356   | 0.49588212 | 0.079186976 | 0.0961535   | 0.05776001  | 0.09732637  |
| R8760165 | 4 | 0.08328998  | 0.097710125 | 0.4742803  | 0.08244731  | 0.10041966  | 0.060358517 | 0.101494074 |
| R8774534 | 1 | 0.076297484 | 0.091923974 | 0.51225585 | 0.075825065 | 0.09460332  | 0.053726707 | 0.09536759  |
| R8781115 | 5 | 0.08520703  | 0.09910597  | 0.46463892 | 0.08413644  | 0.101640716 | 0.062297884 | 0.10297308  |
| R8792267 | 4 | 0.0937528   | 0.106235415 | 0.4178596  | 0.09231167  | 0.108571194 | 0.0710089   | 0.11026037  |
| R8799615 | 4 | 0.1119891   | 0.12180314  | 0.31157592 | 0.11154444  | 0.124827296 | 0.09202047  | 0.12623963  |
| R8813354 | 4 | 0.08676336  | 0.09821744  | 0.46236145 | 0.08500429  | 0.10115705  | 0.06381735  | 0.10267908  |
| R8826799 | 3 | 0.048649423 | 0.06233973  | 0.6805559  | 0.048022017 | 0.06481768  | 0.030285273 | 0.06533     |
| R8834859 | 2 | 0.04333044  | 0.05887117  | 0.7056847  | 0.043541245 | 0.061121553 | 0.026350306 | 0.061100543 |
| R8845676 | 5 | 0.08325736  | 0.0988301   | 0.47163227 | 0.08261882  | 0.10101385  | 0.06046698  | 0.10218058  |
| R8850524 | 5 | 0.0660268   | 0.07993039  | 0.57873905 | 0.06492074  | 0.082553156 | 0.04444994  | 0.08338     |
| R8860977 | 3 | 0.08770395  | 0.099197336 | 0.45670006 | 0.08594359  | 0.102044806 | 0.06476154  | 0.10364868  |
| R8882846 | 4 | 0.04086348  | 0.05551224  | 0.7228394  | 0.04084902  | 0.05761184  | 0.02451128  | 0.057812735 |
| R8917077 | 1 | 0.09678802  | 0.10979989  | 0.3979885  | 0.09561015  | 0.111942865 | 0.07433876  | 0.11353183  |
| R8935140 | 1 | 0.04781351  | 0.06285082  | 0.6812115  | 0.047686182 | 0.06530266  | 0.029649502 | 0.06548584  |
| R8937093 | 3 | 0.11186076  | 0.12218057  | 0.31186602 | 0.11127844  | 0.12466335  | 0.09191249  | 0.12623839  |
| R8944014 | 5 | 0.063639395 | 0.07644467  | 0.5963931  | 0.06213495  | 0.07890483  | 0.04240852  | 0.08007446  |
| R8963331 | 3 | 0.081049085 | 0.09709094  | 0.4831119  | 0.08063366  | 0.099478014 | 0.058257997 | 0.10037839  |
| R8971831 | 3 | 0.10911426  | 0.11967655  | 0.32784304 | 0.1084619   | 0.12247176  | 0.08849445  | 0.123938076 |
| R8976116 | 4 | 0.06447526  | 0.08183314  | 0.5783342  | 0.064273566 | 0.08361674  | 0.043263    | 0.084204055 |
| R8983137 | 2 | 0.100076616 | 0.114449814 | 0.3723212  | 0.10008798  | 0.11697067  | 0.078009605 | 0.11808416  |
| R8998310 | 4 | 0.09022132  | 0.10604147  | 0.42829132 | 0.09007283  | 0.10848812  | 0.067458935 | 0.109425925 |
| R9001803 | 2 | 0.104309686 | 0.11862169  | 0.3487045  | 0.10398291  | 0.12000757  | 0.08274305  | 0.121630564 |
| R9033345 | 5 | 0.07924197  | 0.09377639  | 0.4979117  | 0.07844779  | 0.096651815 | 0.056423526 | 0.09754679  |
| R9047934 | 2 | 0.059053782 | 0.07248369  | 0.6208029  | 0.058000278 | 0.07520065  | 0.0384975   | 0.075961195 |
| R9053141 | 3 | 0.098841146 | 0.10867811  | 0.39345416 | 0.09715165  | 0.11177022  | 0.07654171  | 0.11356297  |
| R9064073 | 5 | 0.078227155 | 0.093881726 | 0.5019079  | 0.07744425  | 0.09595322  | 0.05552332  | 0.09706248  |
| R9072353 | 2 | 0.10413868  | 0.11570543  | 0.35581455 | 0.10333781  | 0.11848774  | 0.08264163  | 0.11987408  |
| R9085798 | 4 | 0.10593412  | 0.11969257  | 0.3396241  | 0.10576528  | 0.1214206   | 0.084620915 | 0.12294244  |
| R9088015 | 3 | 0.08825145  | 0.1029879   | 0.443279   | 0.0876759   | 0.10562549  | 0.06542074  | 0.1067595   |
| R9101835 | 3 | 0.09063862  | 0.104871795 | 0.43067193 | 0.089888    | 0.10739497  | 0.06785394  | 0.10868078  |
| R9101940 | 1 | 0.10000699  | 0.115134165 | 0.37066415 | 0.10026236  | 0.11743017  | 0.07795702  | 0.11854512  |
| R9113571 | 3 | 0.047494598 | 0.062186204 | 0.68423223 | 0.047234382 | 0.064588696 | 0.029400319 | 0.06486367  |
| R9116123 | 3 | 0.048135832 | 0.06296698  | 0.67965895 | 0.04801547  | 0.06557008  | 0.02989688  | 0.06575578  |
| R9127940 | 1 | 0.067494094 | 0.083582275 | 0.56324685 | 0.06714462  | 0.08609716  | 0.04579176  | 0.086643204 |
| R9137173 | 5 | 0.059283547 | 0.07449312  | 0.6140728  | 0.058822356 | 0.07709101  | 0.03874873  | 0.07748837  |
| R9145673 | 4 | 0.07892046  | 0.09501471  | 0.49602875 | 0.07839551  | 0.09720441  | 0.05625139  | 0.09818478  |
| R9163526 | 4 | 0.08730014  | 0.098270684 | 0.4609228  | 0.08529917  | 0.101073556 | 0.064352974 | 0.102780655 |
| R9170872 | 5 | 0.0678973   | 0.08202225  | 0.5667662  | 0.06691972  | 0.0846737   | 0.046167694 | 0.08555316  |
| R9176076 | 5 | 0.026563559 | 0.03761664  | 0.8154115  | 0.026448574 | 0.03962197  | 0.014569353 | 0.039768483 |
| R9210731 | 2 | 0.07155766  | 0.0847935   | 0.5482183  | 0.0701509   | 0.08742957  | 0.049342953 | 0.088507175 |

|          |   |             |             |            |             |             |             |             |
|----------|---|-------------|-------------|------------|-------------|-------------|-------------|-------------|
| R9225354 | 1 | 0.04977422  | 0.06399668  | 0.6724868  | 0.049262803 | 0.06643363  | 0.031151999 | 0.06689394  |
| R9239503 | 5 | 0.047774203 | 0.06241304  | 0.6831297  | 0.047397465 | 0.06453373  | 0.029716859 | 0.065034986 |
| R9245150 | 4 | 0.0684368   | 0.08356571  | 0.5604977  | 0.067790315 | 0.0862422   | 0.046566837 | 0.0869004   |
| R9253870 | 4 | 0.046462778 | 0.060806967 | 0.69115406 | 0.046164315 | 0.063204676 | 0.02865702  | 0.063550174 |
| R9254359 | 4 | 0.02138683  | 0.0321002   | 0.8465253  | 0.021462558 | 0.03356258  | 0.011283565 | 0.03367896  |
| R9254464 | 5 | 0.0475981   | 0.06169079  | 0.6855168  | 0.047117583 | 0.06405695  | 0.029498735 | 0.064521134 |
| R9255058 | 3 | 0.074668    | 0.09039435  | 0.5226458  | 0.07395249  | 0.092530236 | 0.052267518 | 0.09354164  |
| R9286126 | 3 | 0.064744525 | 0.0804831   | 0.5809673  | 0.064193964 | 0.082750544 | 0.043420073 | 0.08344044  |
| R9299236 | 5 | 0.07245248  | 0.08862963  | 0.5341679  | 0.07194715  | 0.09081942  | 0.05028938  | 0.09169407  |
| R9309271 | 5 | 0.058775444 | 0.07533279  | 0.61348534 | 0.05862596  | 0.077464245 | 0.038430676 | 0.07788557  |
| R9314674 | 5 | 0.049109887 | 0.06436789  | 0.67320186 | 0.048961315 | 0.0666877   | 0.03071856  | 0.066952735 |
| R9323873 | 5 | 0.07103552  | 0.086807616 | 0.5440174  | 0.07033692  | 0.08895864  | 0.04898139  | 0.089862555 |
| R9324027 | 4 | 0.077569336 | 0.09347115  | 0.5043407  | 0.07705262  | 0.09582078  | 0.055001147 | 0.09674428  |
| R9328823 | 3 | 0.10094041  | 0.11543336  | 0.36712366 | 0.1009239   | 0.11773363  | 0.078973055 | 0.11887198  |
| R9329742 | 4 | 0.077223845 | 0.09105682  | 0.51259977 | 0.07604209  | 0.09372671  | 0.0545349   | 0.094815865 |
| R9330569 | 2 | 0.080653764 | 0.09379214  | 0.49402037 | 0.07931671  | 0.096605115 | 0.057810653 | 0.09780129  |
| R9354381 | 5 | 0.062832154 | 0.078881346 | 0.5912744  | 0.062412255 | 0.08110722  | 0.041790705 | 0.08170196  |
| R9400562 | 1 | 0.09377413  | 0.107692175 | 0.41204467 | 0.09322066  | 0.110575885 | 0.07106872  | 0.11162373  |
| R9405392 | 5 | 0.057344016 | 0.07273138  | 0.6253125  | 0.056878746 | 0.07504109  | 0.037199166 | 0.075493075 |
| R9410800 | 2 | 0.039955974 | 0.05305535  | 0.7321753  | 0.039632116 | 0.055573445 | 0.02378289  | 0.05582492  |
| R9419876 | 2 | 0.07288539  | 0.08903705  | 0.5310363  | 0.072564125 | 0.09156433  | 0.05065438  | 0.09225837  |
| R9426782 | 6 | 0.094869174 | 0.10667082  | 0.41217107 | 0.09350663  | 0.109446965 | 0.07226838  | 0.11106691  |
| R9462928 | 4 | 0.05110891  | 0.064757094 | 0.66637266 | 0.050383694 | 0.06731933  | 0.032191522 | 0.06786677  |
| R9473965 | 5 | 0.08112395  | 0.09596144  | 0.48590294 | 0.08040858  | 0.09858861  | 0.058346037 | 0.099668436 |
| R9489952 | 3 | 0.08639032  | 0.10235386  | 0.45096868 | 0.08614406  | 0.10480233  | 0.06359016  | 0.10575055  |
| R9537646 | 4 | 0.07813083  | 0.092725955 | 0.50540555 | 0.077042826 | 0.09497629  | 0.05550631  | 0.09621229  |
| R9540861 | 5 | 0.06683185  | 0.084908426 | 0.562742   | 0.06669478  | 0.086436175 | 0.045328    | 0.08705883  |
| R9543528 | 3 | 0.12225746  | 0.1333353   | 0.24686965 | 0.12286884  | 0.13319309  | 0.10595735  | 0.13551833  |
| R9557117 | 5 | 0.05565393  | 0.07092787  | 0.6351022  | 0.055292234 | 0.07338972  | 0.035833955 | 0.07380007  |
| R9566976 | 3 | 0.08647106  | 0.10089948  | 0.45523706 | 0.0856644   | 0.103467695 | 0.06356573  | 0.10469462  |
| R9579311 | 2 | 0.05534432  | 0.070530705 | 0.6365784  | 0.055137143 | 0.0733134   | 0.035570785 | 0.07352528  |
| R9582641 | 4 | 0.07793227  | 0.093627974 | 0.50278425 | 0.07736494  | 0.09601215  | 0.055305026 | 0.09697337  |
| R9583560 | 2 | 0.052951396 | 0.06709879  | 0.6537755  | 0.052419957 | 0.06989499  | 0.0335939   | 0.07026545  |
| R9585968 | 1 | 0.09107688  | 0.10581077  | 0.42636216 | 0.09055494  | 0.10842331  | 0.068297796 | 0.10947411  |
| R9587366 | 5 | 0.073154636 | 0.08871811  | 0.5325774  | 0.07226925  | 0.09065284  | 0.050868794 | 0.091758944 |
| R9596785 | 4 | 0.061859384 | 0.07746035  | 0.597891   | 0.061440986 | 0.079945564 | 0.04095296  | 0.08044971  |
| R9598418 | 3 | 0.07328163  | 0.08848554  | 0.5315321  | 0.0726519   | 0.09120017  | 0.05090349  | 0.09194521  |
| R9610864 | 5 | 0.05473669  | 0.06957286  | 0.64303184 | 0.05393301  | 0.07141015  | 0.03511773  | 0.07219769  |
| R9649089 | 4 | 0.08263254  | 0.09672476  | 0.47946146 | 0.081590645 | 0.0993013   | 0.059755635 | 0.10053371  |
| R9679238 | 3 | 0.09926292  | 0.113635816 | 0.37750375 | 0.09915027  | 0.11614026  | 0.07708135  | 0.11722561  |
| R9680160 | 5 | 0.09769467  | 0.109660655 | 0.39426547 | 0.09658829  | 0.11245173  | 0.075333476 | 0.114005715 |
| R9721493 | 2 | 0.094215356 | 0.10802502  | 0.41145235 | 0.09312427  | 0.10999478  | 0.071624435 | 0.111563794 |
| R9730707 | 1 | 0.093060546 | 0.101754054 | 0.4311462  | 0.090875074 | 0.10549398  | 0.07036668  | 0.10730341  |
| R9738414 | 2 | 0.052757427 | 0.06589273  | 0.6583964  | 0.05179657  | 0.06850348  | 0.033439126 | 0.069214255 |
| R9741184 | 4 | 0.07063699  | 0.08591188  | 0.5477527  | 0.06983485  | 0.08822532  | 0.048543207 | 0.08909507  |

|          |   |             |             |            |             |             |             |             |
|----------|---|-------------|-------------|------------|-------------|-------------|-------------|-------------|
| R9764427 | 4 | 0.10475254  | 0.11684049  | 0.350621   | 0.10417574  | 0.11948625  | 0.08332374  | 0.12080023  |
| R9771008 | 5 | 0.0610305   | 0.0763733   | 0.6034777  | 0.060561147 | 0.0789331   | 0.040216174 | 0.07940804  |
| R9781891 | 3 | 0.119564496 | 0.124037445 | 0.27981013 | 0.1178574   | 0.1272444   | 0.1020181   | 0.12946802  |
| R9794121 | 3 | 0.07809845  | 0.09377     | 0.5016411  | 0.0775826   | 0.09628137  | 0.055447612 | 0.09717893  |
| R9798367 | 4 | 0.042728446 | 0.05572929  | 0.7167216  | 0.04216445  | 0.058209386 | 0.025803978 | 0.058642827 |
| R9809441 | 5 | 0.042204536 | 0.0560568   | 0.71761876 | 0.041848402 | 0.05818947  | 0.025492126 | 0.058589928 |
| R9809661 | 4 | 0.06908728  | 0.08547151  | 0.5533891  | 0.068702035 | 0.08769828  | 0.04723674  | 0.08841515  |
| R9815218 | 5 | 0.09803407  | 0.10781719  | 0.39878237 | 0.09623447  | 0.110869534 | 0.07565084  | 0.112611525 |
| R9817056 | 3 | 0.050150886 | 0.06389422  | 0.67155814 | 0.04951966  | 0.06644922  | 0.031445265 | 0.06698258  |
| R9817161 | 5 | 0.07645023  | 0.09281243  | 0.5094901  | 0.076131485 | 0.0951639   | 0.053946882 | 0.09600498  |
| R9818080 | 0 | 0.10334539  | 0.11802069  | 0.35157964 | 0.103709266 | 0.12023915  | 0.08166997  | 0.12143588  |
| R9880904 | 1 | 0.09280772  | 0.10886415  | 0.41380513 | 0.09228986  | 0.11028758  | 0.070240565 | 0.11170496  |
| R9886653 | 4 | 0.09695409  | 0.10969636  | 0.39638075 | 0.09609892  | 0.11253451  | 0.07452352  | 0.113811865 |
| R9904978 | 1 | 0.11614494  | 0.121827245 | 0.29718083 | 0.11476742  | 0.12551014  | 0.09728427  | 0.12728518  |
| R9905342 | 3 | 0.07027839  | 0.08326097  | 0.5563335  | 0.06885204  | 0.08599181  | 0.048183132 | 0.08710011  |
| R9907075 | 2 | 0.08488526  | 0.099526405 | 0.46431947 | 0.08406068  | 0.10200338  | 0.06199921  | 0.10320567  |
| R9936070 | 2 | 0.059629496 | 0.07628407  | 0.6079384  | 0.05955377  | 0.07859212  | 0.039095502 | 0.078906626 |
| R9938478 | 3 | 0.07140832  | 0.08514651  | 0.5473447  | 0.070235506 | 0.08782307  | 0.049251333 | 0.08879059  |
| R9940994 | 3 | 0.07156438  | 0.08708555  | 0.54210967 | 0.07065981  | 0.08898123  | 0.04948249  | 0.09011693  |
| R9950567 | 4 | 0.051780764 | 0.065466754 | 0.6617775  | 0.051193457 | 0.06833998  | 0.03266182  | 0.06877975  |
| R9958949 | 5 | 0.07740098  | 0.091776125 | 0.51082146 | 0.0761503   | 0.0939514   | 0.054701135 | 0.0951986   |
| R9976232 | 4 | 0.08410582  | 0.0961564   | 0.476842   | 0.0824021   | 0.09894628  | 0.061141945 | 0.100405484 |
| R9991313 | 1 | 0.09904453  | 0.11014808  | 0.3898366  | 0.09736154  | 0.112394474 | 0.07683336  | 0.114381395 |
| R9996478 | 3 | 0.10415122  | 0.1156333   | 0.35753337 | 0.10285437  | 0.11764049  | 0.08269444  | 0.1194928   |

39

Table S10(Cox model discrimination for clinical covariates with and without niche abundance)

| cohort   | information      | c-index |
|----------|------------------|---------|
| TCGA     | clinical only    | 0.6927  |
|          | clinical + niche | 0.731   |
| METABRIC | clinical only    | 0.6587  |
|          | clinical + niche | 0.6659  |

40

Clinical covariates included age at diagnosis, pathological/tumor stage, ER status, PR status, HER2 status, and PAM50 molecular subtype.
